# 1 Mapping protein interactions of sodium channel Nav1.7 using 2 epitope-tagged gene targeted mice

3 Alexandros H. Kanellopoulos<sup>1†</sup>, Jennifer Koenig<sup>1</sup>, Honglei Huang<sup>2</sup>, Martina Pyrski<sup>3</sup>,  
4 Queensta Millet<sup>1</sup>, Stephane Lolignier<sup>1</sup>, Toru Morohashi<sup>1</sup>, Samuel J. Gossage<sup>1</sup>, Maude  
5 Jay<sup>1</sup>, John Linley<sup>1</sup>, Georgios Baskozos<sup>4</sup>, Benedikt Kessler<sup>2</sup>, James J. Cox<sup>1</sup>, Frank  
6 Zufall<sup>3</sup>, John N. Wood<sup>1\*</sup> and Jing Zhao<sup>1†\*\*</sup>

7 <sup>1</sup>Molecular Nociception Group, WIBR, University College London, Gower Street,  
8 London WC1E 6BT, UK.

9 <sup>2</sup>Mass Spectrometry Laboratory, Target Discovery Institute, University of Oxford, The  
10 Old Road Campus, Oxford, OX3 7FZ, UK.

11 <sup>3</sup>Center for Integrative Physiology and Molecular Medicine, Saarland University,  
12 Kirrbergerstrasse, Bldg. 48, 66421 Homburg, Germany.

13 <sup>4</sup>Division of Bioscience, University College London, Gower Street, London WC1E 6BT,  
14 UK.

15 <sup>†</sup>These authors contributed equally to directing this work.

16 <sup>\*</sup>Correspondence author. Tel: +44 207 6796 954; E-mail: j.wood@ucl.ac.uk

17 <sup>\*\*</sup>Corresponding author: Tel: +44 207 6790 959; E-mail: jing02.zhao@ucl.ac.uk

## 18    **Abstract**

19            The voltage-gated sodium channel Nav1.7 plays a critical role in pain pathways.  
20    Besides action potential propagation, Nav1.7 regulates neurotransmitter release,  
21    integrates depolarizing inputs over long periods and regulates transcription. In order  
22    to better understand these functions, we generated an epitope-tagged Nav1.7 mouse  
23    that showed normal pain behavior. Analysis of Nav1.7 complexes affinity-purified  
24    under native conditions by mass spectrometry revealed 267 Nav1.7 associated  
25    proteins including known interactors, such as the sodium channel  $\beta 3$  subunit (Scn3b)  
26    and collapsin response mediator protein (Crmp2), and novel interactors. Selected  
27    novel Nav1.7 protein interactors membrane-trafficking protein synaptotagmin-2  
28    (Syt2), G protein-regulated inducer of neurite outgrowth 1 (Gprin1), L-type amino acid  
29    transporter 1 (Lat1) and transmembrane P24 trafficking protein 10 (Tmed10) together  
30    with Scn3b and Crmp2 were validated using co-immunoprecipitation and functional  
31    assays. The information provided with this physiologically normal epitope-tagged  
32    mouse should provide useful insights into the pain mechanisms associated with  
33    Nav1.7 channel function.

## 34 Introduction

35 Pain is a major clinical problem. A 2012 National Health Interview Survey  
 36 (NHIS) in the United States revealed that 25.3 million adults (11.2%) suffered from  
 37 daily (chronic) pain and 23.4 million (10.3%) reported severe pain within a previous  
 38 three-month period (Nahin, 2015). Many types of chronic pain are difficult to treat as  
 39 most available drugs have limited efficacy and can cause side effects. There is thus a  
 40 huge unmet need for novel analgesics (Woodcock, 2009). Recent human and animal  
 41 genetic studies have indicated that the voltage-gated sodium channel (VGSC) Nav1.7  
 42 plays a crucial role in pain signaling (Dib-Hajj et al., 2013, Cox et al., 2006, Nassar et  
 43 al., 2004), highlighting Nav1.7 as a promising drug target for development of novel  
 44 analgesics (Emery et al., 2016, Habib et al., 2015).

45 VGSCs consist of a large pore-forming  $\alpha$ -subunit (~260 kDa) together with  
 46 associated auxiliary  $\beta$ -subunits (33-36 kDa) and play a fundamental role in the  
 47 initiation and propagation of action potentials in electrically excitable cells. Nine  
 48 isoforms of  $\alpha$ -subunits (Nav1.1-1.9) that display distinct expression patterns and  
 49 variable channel properties have been identified in mammals (Frank and Catterall,  
 50 2003). Nav1.7, encoded by the gene *SCN9A* in humans, is selectively expressed  
 51 peripherally in dorsal root ganglion (DRG), trigeminal ganglia and sympathetic  
 52 neurons (Black et al., 2012, Toledo-Aral et al., 1997), as well as the central nervous  
 53 system (Branco et al., 2016, Weiss et al., 2011). As a large membrane ion channel,  
 54 Nav1.7 produces a fast-activating, fast-inactivating and slowly re-priming current  
 55 (Klugbauer et al., 1995), acting as a threshold channel to contribute to the generation  
 56 and propagation of action potentials by amplifying small sub-threshold depolarisations  
 57 (Rush et al., 2007). The particular electrophysiological characteristics of Nav1.7

suggests that it plays a key role in initiating action potentials in response to depolarization of sensory neurons by noxious stimuli (Habib et al., 2015). In animal studies, our previous results demonstrated that conditional Nav1.7 knockout mice have major deficits in acute, inflammatory and neuropathic pain (Minett et al., 2012, Nassar et al., 2004). Human genetic studies showed that loss of function mutations in Nav1.7 lead to congenital insensitivity to pain whereas gain of function mutations cause a range of painful inherited disorders (Dib-Hajj et al., 2013, Cox et al., 2006). Patients with recessive Nav1.7 mutations are normal (apart from being pain-free and anosmic), suggesting selective Nav1.7 blocking drugs are therefore likely to be effective analgesics with limited side effects (Cox et al., 2006). Recent studies also showed that Nav1.7 is involved in neurotransmitter release in both the olfactory bulb and spinal cord (Minett et al., 2012, Weiss et al., 2011).

Over the past decade, an enormous effort has been made to develop selective Nav1.7 blockers. Efficient selective Nav1.7 antagonists have been developed, however, Nav1.7 antagonists require co-administration of opioids to be fully analgesic (Minett et al., 2015). Nav1.7 thus remains an important analgesic drug target and an alternative strategy to target Nav1.7 could be to interfere with either intracellular trafficking of the channel to the plasma membrane, or the downstream effects of the channel on opioid peptide expression. Although some molecules, such as Crmp2, ubiquitin ligase Nedd4-2, fibroblast growth factor 13 (FGF13) and PDZ domain-containing protein Pdzd2, have been associated with the regulation of trafficking and degradation of Nav1.7, the entire protein-protein interaction network of Nav1.7 still needs to be defined (Dustrude et al., 2013, Laedermann et al., 2013, Shao et al., 2009, Bao, 2015, Yang et al., 2017). Affinity purification (AP) and targeted tandem affinity purification (TAP) combined with mass spectrometry (MS) is a useful method for

mapping the organization of multiprotein complexes (Wildburger et al., 2015, Angrand et al., 2006). Using the AP-MS or TAP-MS method to characterize protein complexes from transgenic mice allows the identification of complexes in their native physiological environment in contact with proteins that might only be specifically expressed in certain tissues (Fernandez et al., 2009). The principal aim of this study was to identify new protein interaction partners and networks involved in the trafficking and regulation of sodium channel Nav1.7 using mass spectrometry and our recently generated epitope (TAP)-tagged Nav1.7 knock-in mouse. Such information should throw new light on the mechanisms through which Nav1.7 regulates a variety of physiological systems, as well as propagating action potentials, especially in pain signaling pathways.

## Results

### The TAP tag does not affect Nav1.7 channel function

Prior to generating the TAP-tagged Nav1.7 knock-in mouse, we tested the channel function of TAP-tagged Nav1.7 in HEK293 cells by establishing a HEK293 cell line stably expressing TAP-tagged Nav1.7. A 5-kDa TAP tag consisting of a poly-histidine affinity tag (HAT) and a 3x FLAG tag in tandem (Terpe, 2003), separated by a unique TEV-protease cleavage site, was fused to the C-terminus of Nav1.7 (Fig 1A). The expression of TAP-tagged Nav1.7 was detected with immunocytochemistry using an anti-FLAG antibody. The result showed that all the HEK293 cells expressed TAP-tagged Nav1.7 (Fig 1B). The channel function of TAP-tagged Nav1.7 was examined with electrophysiological analysis and the result showed that all the cells presented normal functional Nav1.7 currents (Fig 1C). Activation and fast inactivation data were

identical for wild-type Nav1.7 and TAP-tagged Nav1.7 (Fig 1D) demonstrating that the TAP tag does not affect channel function of Nav1.7.

## Generation of a TAP-tagged Nav1.7 mouse

We used a conventional gene targeting approach to generate an epitope-tagged Nav1.7 mouse. The gene targeting vector was constructed using an *Escherichia coli* recombineering based method (Bence et al., 2005) (Supplemental Fig S1). A TAP tag, which contains a HAT domain, a TEV cleavage site and 3x Flag tags (Fig 1A), was inserted into the open reading frame at the 3'-end prior to the stop codon in exon 27 of Nav1.7 (NCBI Reference: NM\_001290675) (Fig 2A). The final targeting vector construct containing a 5' homology arm (3.4 kb), a TAP tag, neomycin cassette and a 3' homology arm (5.8 kb) (Fig 2B) was transfected into the 129/Sv embryonic stem (ES) cells. 12 colonies with the expected integration (targeting efficiency was 3.5%) were detected using Southern blot (Fig 2C). Germline transmission and intact TAP tag insertion after removal of the neo cassette was confirmed with Southern blot, PCR and RT-PCR, respectively (Fig 2D-F). This mouse line is henceforth referred to as Nav1.7<sup>TAP</sup>.

## Nav1.7<sup>TAP</sup> mice have normal pain behavior

The homozygous Nav1.7<sup>TAP</sup> knock-in mice (KI) were healthy, fertile and apparently normal. Motor function of the mice was examined with the Rotarod test. The average time that KI animals stayed on the rod was similar to the WT mice (Fig 3A), suggesting there is no deficit on motor function in the KI mice. The animal responses to low-threshold mechanical, acute noxious thermal, noxious mechanical stimuli, and acute peripheral inflammation were examined with von Frey filaments, Hargreaves' test, Randall-Selitto apparatus and Formalin test, respectively. The

results showed that TAP-tagged KI mice had identical responses to these stimuli compare to the littermate WT control mice (Fig 3B-E), indicating Nav1.7<sup>TAP</sup> mice have normal acute pain behavior.

### **Expression pattern of TAP-tagged Nav1.7 in the nervous system**

We used immunohistochemistry to examine the expression pattern of TAP-tagged Nav1.7 in the nervous system of Nav1.7<sup>TAP</sup> mice. The results showed that the FLAG-tag was expressed in the olfactory bulb, with strong staining visible in the olfactory nerve layer, the glomerular layer, and in the accessory olfactory bulbs (Fig 4A-D), consistent with previous results (Weiss et al., 2011). In the brain, FLAG-tag expression was present in the medial habenula, the anterodorsal thalamic nucleus, the laterodorsal thalamic nucleus, and in the subfornical organ that is located in the roof of the dorsal third ventricle (Fig 4E,F) and is involved in the control of thirst (Oka et al., 2015). The FLAG-tag was also present in neurons of the posterodorsal aspect of the medial amygdala and in the hypothalamus in neurons of the arcuate nucleus (Fig 4G-I) as confirmed in a recent study (Branco et al., 2016). A clear staining appeared in neurons of the substantia nigra reticular region and the red nucleus magnocellular region of the midbrain, and in neurons of the pontine nuclei located in the hindbrain (Fig 4J-L). In the spinal cord, FLAG-tag expression was visible in the superficial layer of the dorsal horn. We co-stained the spinal cord with IB4, a marker for the inner part of lamina II, and the results showed that the TAP-tagged Nav1.7 was expressed in Laminae I, II and III (Fig 4M-O). In the PNS, however, there was no positive FLAG-tag staining found in DRG, sciatic nerve or skin nerve terminals (data not shown). This could be because of masking of the tag in the PNS, preventing the antibody binding. We also examined the TAP-tagged Nav1.7 expression pattern in

different tissues with Western blot using an anti-FLAG antibody. TAP-tagged Nav1.7 bands were present in olfactory bulb, hypothalamus, spinal cord, sciatic nerve and DRG, but not in cortex, cerebellum, skin, lung, heart and pancreas (Fig 5E).

### **Optimisation of single- and tandem- affinity purification of TAP-tagged Nav1.7**

The TAP tag on Nav1.7 offered a possibility of two consecutive affinity purifications, a single-step affinity purification (ss-AP) (Step 1 and 2) and tandem affinity purification (Step 1 - 4) (Fig 5A). CHAPS and DOC lysis buffers were evaluated to solubilize TAP-tagged Nav1.7 and its protein complex from tissues, e.g. DRG, spinal cord, olfactory bulbs and hypothalamus, in the Co-IP system. CHAPS is a non-denaturing zwitterionic detergent, commonly used to extract membrane proteins in their native conformation. In comparison to strong anionic detergents like SDS, CHAPS preserves protein-protein interactions and is compatible with downstream applications such as mass spectrometry. The result showed that TAP-tagged Nav1.7 from DRG and olfactory bulbs was clearly solubilized and precipitated by both purifications – ss-AP and tandem affinity purification in 1% CHAPS buffer (Fig 5B). Also the result from ss-AP showed that TAP-tagged Nav1.7 could be immunoprecipitated from hypothalamus, sciatic nerve, spinal cord, olfactory bulb and DRG of KI mice, but not from these tissues of WT control mice (Fig 5C). However, the DOC lysis buffer, which was used to investigate the TAP-tagged PSD-95 protein complex (Fernandez et al., 2009), did not solubilize TAP-tagged Nav1.7 from mouse tissue (data not shown).

### **Identification of TAP-tagged Nav1.7 associated complexes by AP-MS**

We next identified the components of Nav1.7 complexes using ss-AP followed by LC-MS/MS. Briefly, the TAP-tagged Nav1.7 complexes were extracted from DRG,



spinal cord, olfactory bulb and hypothalamus using ss-AP (see Materials and Methods). In total 189,606 acquired spectra from 12 samples, in which each group (KI and WT) contains 6 biological replicate samples and each sample was from one mouse, were used for protein identification. 1,252 proteins were identified with a calculated 0.96% false discovery rate (FDR). 267 proteins (Supplemental Tab S1) met those criteria and were shortlisted based on the criteria described in Materials and Methods. The proteins only appearing in Nav1.7<sup>TAP</sup> mice and the representatively selected proteins are listed in Table 1. PANTHER cellular component analysis of these 267 proteins revealed 8 different cellular components (Fig 6A). These proteins were further classified into 22 groups based on their function, including 12 membrane trafficking proteins, 23 enzyme modulators and 4 transcription factors (Fig 6B).

### **Validation of TAP-tagged Nav1.7 interacting proteins using Co-IP**

The physical interactions between Nav1.7 and interacting protein candidates were assessed using Co-IP in an *in vitro* system by co-expressing the candidates in a TAP-tagged Nav1.7 stable cell line. A number of candidates of interest, such as Syt2, Gprin1, Lat1, and Tmed10, together with known Nav1.7 protein interactors Scn3b and Crmp2 were chosen from the identified Nav1.7 associated protein list (Supplemental Tab S1 and Table 1) for further validation.

Scn3b and Crmp2 have previously been implied to associate with Nav1.7 (Dustrude et al., 2013, Ho et al., 2012) and firstly we confirmed the physical interaction between these proteins and Nav1.7 by co-immunoprecipitation (Fig 5D). Next, we investigated some potential novel binding partners, such as Syt2, Gprin1, Lat1, and Tmed10. Synaptotagmin is a synaptic vesicle membrane protein that functions as a calcium sensor for neurotransmission (Chapman, 2002). Sampo *et al.* showed a direct

physical binding of synaptotagmin-1 with Nav1.2 at a site which is highly conserved across all voltage-gated sodium channels (Sampo et al., 2000) suggesting that the synaptotagmin family can associate with other VGSCs. Nav1.7 found at pre-synaptic terminals appears to be involved in neurotransmitter release (Minett et al., 2012, Black et al., 2012). Our Co-IP result shows that Syt2 was co-precipitated with TAP-tagged Nav1.7 (Fig 5D). Interestingly other synaptic proteins also co-precipitated with Nav1.7 including SNARE complex protein Syntaxin-12 (Supplemental Tab S1). Gpr1 was selected for further validation due to its involvement in regulating mu-opioid receptor (MOR) activity (Ge et al., 2009), highlighting a potential role in connection between the opioid system and Nav1.7 in pain. Our Co-IP results confirmed the protein interaction between Gpr1 and Nav1.7 (Fig 5D). Gabapentin was developed to treat epilepsy, but it is now used to treat various forms of chronic pain. However, the analgesic mechanisms of gabapentin are not entirely clear, but involve inhibiting the function of N-type voltage-gated calcium channels (Cav2.2) by blocking the association of pore-forming  $\alpha 1$  subunits with auxiliary  $\alpha 2\delta$ -1 subunits to reduce channel activity, membrane trafficking, and neurotransmitter release in DRG neurons (Kukkar et al., 2013). As the transporter of gabapentin, Lat1 has been confirmed with Co-IP (Fig 5D), suggesting that Lat1 and/or gabapentin may be involved in the regulation of Nav1.7 channel function. However, future experiments are required to determine the functional significance of the Nav1.7-Lat1 interaction in this regard. As a member of the p24 family, Tmed10 was selected due to its well-characterised properties as a protein trafficking regulator. Previous studies have highlighted that Tmed10 plays an important role as a cargo receptor in the trafficking of various membrane proteins. For example, Tmed10 has been observed to modulate the transport and trafficking of amyloid- $\beta$  precursor protein (Vetrivel et al., 2007),

endogenous glycosylphosphatidylinositol (GPI)-anchored proteins CD59 and folate receptor alpha (Bonnon et al., 2010), and several G protein-coupled receptors (GPCRs) (Luo et al., 2011). Our Co-IP result showed that Tmed10 was co-immunoprecipitated with TAP-tagged Nav1.7 (Fig 5D), suggesting Tmed10 may regulate Nav1.7 trafficking. In summary, all these four potential interacting proteins selected for further validation were confirmed as interactors by Co-IP, giving confidence in the Nav1.7<sup>TAP</sup> mass spectrometry list.

## Functional characterisation of Crmp2

Crmp2 is the presumed target of the anti-epileptic drug Lacosamide based on binding studies (Wilson and Khanna, 2015). We sought to evaluate the possible electrophysiological effects of Crmp2 on Nav1.7 and in addition understand the relevance of Crmp2 to the action of the drug on Nav1.7 current density. Transfection of Crmp2 into a Nav1.7 stable HEK293 cell line revealed a nearly two-fold increase in sodium current density (Fig 7A-C), suggesting Crmp2 acts as a transporter for Nav1.7 (Dustrude et al., 2013). Next, we sought to investigate the effect of Lacosamide on sodium currents. In cells not transfected with Crmp2, Nav1.7 currents displayed no significant changes in current density following prolonged 5-hour exposure to Lacosamide (Fig 7A,B). Interestingly, following 5-hour incubation with Lacosamide in Crmp2 transfected cells, a complete reversal in the increase in Nav1.7 current density provoked by Crmp2 was observed (Fig 7A,D).

## Discussion

Experimental evidence has shown that protein-protein interactions play a key role in trafficking, distribution, modulation and stability of ion channels (Catterall, 2010,

Bao, 2015, Chen-Izu et al., 2015, Laedermann et al., 2015, Shao et al., 2009, Leterrier et al., 2010). Here, we mapped the protein-interaction network of Nav1.7 using an AP-MS proteomic approach with an epitope-tagged Nav1.7 knock-in mouse line. This is the first report to define an ion channels' macromolecular complex using an epitope-tagged gene targeted mouse.

AP-MS requires specific high-affinity antibodies against the target proteins of interest (Wildburger et al., 2015). However, binding may compete with normal protein-protein interactions. To overcome these limitations, epitope tags on target proteins were introduced into the AP-MS system. In the last decade, single-step and tandem affinity purification have been widely applied in protein-protein interaction studies (Wildburger et al., 2015, Fernandez et al., 2009). In contrast to ss-AP, TAP produces lower background and less contamination. However, due to its longer experimental washing procedures and two-step purification, TAP coupled with MS analysis may not be a sensitive method to detect transient and dynamic protein-protein interactions. In recent years, along with newly developed highly sensitive mass spectrometer techniques and powerful quantitative proteomics analysis methods, ss-AP was employed to identify both transient and stable protein-protein interactors (Keilhauer et al., 2015, Oeffinger, 2012). For example, using a single-step FLAG approach, Chen and colleagues defined specific novel interactors for the catalytic subunit of PP4, which they had not previously observed with TAP-MS (Chen and Gingras, 2007). Thus, ss-AP followed by sensitive LC-MS/MS analysis was applied in this study. In fact, many dynamic modulator proteins were identified to interact with Nav1.7 in this study, such as Calmodulin (Calm1) (Supplemental Tab S1) which was found to bind to the C-terminus of other VGSCs Nav1.4 and Nav1.6, and regulates channel function (Herzog et al., 2003). Four proteins, Crmp2, Nedd4-2, FGF13 and Pdzd2, have previously been

reported as Nav1.7 protein interactors (Ho et al., 2012, Sheets et al., 2006, Shao et al., 2009, Yang et al., 2017). Laedermann *et al.* showed that the E3 ubiquitin ligase Nedd4-2 regulates Nav1.7 by ubiquitination in neuropathic pain (Laedermann et al., 2013). Shao *et al.* demonstrated that Pdzd2 binds to the second intracellular loop of Nav1.7 by a GST pull-down assay in an *in vitro* system (Shao et al., 2009). We did not find the previously reported Nav1.7 interactors Nedd4-2, FGF13 and Pdzd2. This may be because Nedd4-2 and FGF13 only binds to Nav1.7 in neuropathic pain and heat nociception conditions, respectively, and Pdzd2 shows strong binding *in vitro* but not *in vivo*. Apart from known Nav1.7 and other Nav protein interactors, we also identified a broad range of important novel interactors that belong to different protein classes, such as cytoskeletal/structural/cell adhesion proteins and vesicular/trafficking/transport proteins (Fig 6B).

Using Co-IP and a co-expression *in vitro* system, we confirmed a direct physical interaction between Nav1.7 and novel Nav1.7 interactors, such as Syt2, Gprin1, Lat1 and Tmed10, and known interactors Scn3b and Crmp2 as well. Furthermore, we demonstrated that transient over-expression of Crmp2 can up-regulate Nav1.7 current density in stably expressing Nav1.7 HEK293 cells and this up-regulation can be reversed by applying Lacosamide. Taken together, FLAG ss-AP coupled with quantitative MS seems to be a powerful and reliable tool for investigating protein interactions of membrane ion channels.

VGSCs are known to exist in macromolecular complexes (Meadows and Isom, 2005). The  $\beta$  subunits are members of the immunoglobulin (Ig) domain family of cell-adhesion molecules (CAM). As well as sodium channel  $\alpha$  subunits, the  $\beta$  subunits also bind to a variety of cell adhesion molecules such as Neurofascin, Contactin,

Tenascins, and NrCAMs (Srinivasan et al., 1998, McEwen and Isom, 2004, Ratcliffe et al., 2001, Cusdin et al., 2008, Namadurai et al., 2015). In our data set (Supplemental Tab S1), the sodium channel  $\beta 3$  subunit and some CAMs such as Ncam1 and Neurofascin, have been found to associate with the Nav1.7  $\alpha$  subunit. The crystal structure of the human  $\beta 3$  subunit has been solved recently. The  $\beta 3$  subunit Ig-domain assembles as a trimer in the crystal asymmetric unit (Namadurai et al., 2014). This raises the possibility that trimeric  $\beta 3$  subunits binding to Nav1.7  $\alpha$  subunit(s) form a large complex together with other sodium channels, as well as CAMs and cytoskeletal proteins in the plasma membrane.

Nav1.7 has also been linked to opioid peptide expression, and enhanced activity of opioid receptors is found in the Nav1.7 null mutant mouse (Minett et al., 2015). Interestingly, Gprin1, which is known to interact with opioid receptors as well as other GPCRs, was found to co-immunoprecipitate with Nav1.7. This suggests that GPCR sodium channel interactions could add another level of regulatory activity to the expression of Nav1.7. More recently, Branco and colleagues reported that Nav1.7 in hypothalamic neurons plays an important role in body weight control (Branco et al., 2016). We found that Nav1.7 was not only present in the arcuate nucleus but also in other regions of the brain such as the medial amygdala, medial habenula, anterodorsal thalamic nucleus, laterodorsal thalamic nucleus, and in the subfornical organ, substantia nigra reticular part and the red nucleus magnocellular part of the midbrain, and in neurons of the pontine nuclei located in the hindbrain. Nav1.7 thus has other functions in the CNS that remain to be elucidated.

Overall, the present findings provide new insights into the interactome of Nav1.7 for advancing our understanding of Nav1.7 function. Our data also show that the ss-

AP coupled LC-MS/MS is a sensitive, reliable and high-throughput approach to identify protein-protein interactors for membrane ion channels, using epitope-tagged gene targeted mice.

## **Materials and Methods**

### **Generation of a TAP-tagged Nav1.7 expressing stable HEK293 cell line**

A HEK293 cell line stably expressing TAP tagged Nav1.7 was established as previously described (Koenig et al., 2015). Briefly, a sequence encoding a TAP tag (peptide: SRK DHL IHN VHK EEH AHA HNK IEN LYF QGE LPT AAD YKD HDG DYK DHD IDY KDD DDK) was inserted immediately prior to the stop codon of Nav1.7 in the SCN9A mammalian expression construct FLB (Cox et al., 2006). The TAP tag at the extreme C-terminus of Nav1.7 comprises a HAT domain and 3 FLAG tags, enabling immunodetection with either anti-HAT or anti-FLAG antibodies. The function and expression of TAP tagged Nav1.7 in this HEK293 cell line were characterized with both immunocytochemistry and electrophysiological patch clamp analysis.

### **Generation of Nav1.7<sup>TAP</sup> knock-in mice**

The gene targeting vector was generated using a BAC homologous recombineering-based method (Liu et al., 2003). Four steps were involved in this procedure (Fig 2 – figure supplement 1). Step 1, two short homology arms (HA) HA3 and HA4 corresponding to 509 bp and 589 bp sequences within intron 26 and after exon 27 of Nav1.7, respectively, were amplified by PCR using a BAC bMQ277g11 (Source Bioscience, Cambridge UK) DNA as a template, and then inserted into a retrieval vector pTargeter (Fernandez et al., 2009) (a gift from Dr Seth GN Grant) by subcloning. Step 2, a 9.1 kb genomic DNA fragment (3.4 kb plus 5.8 kb) was retrieved



through homologous recombineering by transforming the *KpnI*-linearized pTargeter-HA3-HA4 vector into EL250 *E. coli* cells containing BAC bMQ277g11. Step 3, short homology arms HA1 and HA2 corresponding to 550 bp (before stop codon of Nav1.7) and 509 bp (starting from stop codon of Nav1.7) respectively were amplified by PCR, and then cloned into pneoflox vector (Fernandez et al., 2009) (a gift from Dr Seth GN Grant) containing TAP tag, leaving in between the TAP tag sequence, 2 LoxP sites, PGK and EM7 promoters, the G418<sup>r</sup> gene and a SV40 polyadenylation site. Step 4, the cassette flanked by two homology arms (HA1 and HA2) was excised by *XhoI* and *BglI* digestion and transformed into recombination-competent EL250 cells containing pTargeter-HA3-HA4 plasmid. Then, the TAG tag cassette was inserted into the pTargeter-HA3-HA4 vector by recombination in EL250 *E. coli* cells. The correct recombination and insertion of the targeting cassette were confirmed by restriction mapping and DNA sequencing. The complete gene targeting vector containing 5'-end homologous Nav1.7 sequence of 3.4 kb and a 3'-end homology arm of 5.8 kb was linearized with *PmeI* digestion for ES cell electroporation. All the homology arms HA1, HA2, HA3 and HA4 were amplified with NEB Phusion PCR Kit using bMQ277g111 BAC clone DNA as a template. Primers used to create the recombination arms included:

HA1XhoIF (HA1, forward) - acactcgagAGCCAAACAAAGTCCAGCT

HA1XbaIR (HA1, reverse) - tgttctagaTTTCCTGCTTTCGTCTTTCTC

HA2Acc65IF (HA2, forward) - tgaggtacctagAGCTTCGGTTTTGATACACT

HA2BgIIIR (HA2, reverse) - gatagatctTTGATTTTGATGCAATGTAGGA

HA3SpeIF (HA3, forward) - ctactagtCTCTTCATACCCAACATGCCTA

HA3KpnIR (HA3, reverse) - aatggtaccGGATGGTCTGGGACTCCATA

HA4KpnIF (HA4, forward) - gaaggtaccGCTAAGGGGTCCCAAATTGT



371 HA4PmeIR (HA4, reverse) - tcagtttaaacGGGATGGGAGATTACGAGGT

372 To generate TAP tagged Nav1.7 mice, the linearized targeting vector was transfected  
 373 into 129/Sv ES cells. Cells resistant to G418 were selected by culturing for 9 days.  
 374 Recombined ES cell clones were identified using Southern blot-based screening.  
 375 Three Clones that were confirmed to be correct using Southern blot were injected into  
 376 C57BL/6 blastocysts at the Transgenic Mouse Core facility of the Institute of Child  
 377 Heath (ICH). The chimeric animals were crossed to C57BL/6 and the germline  
 378 transmission was confirmed by Southern blot. The neomycin cassette was removed  
 379 by crossing with global Cre mice. The correct removal of the neomycin cassette and  
 380 TAP tag insertion was confirmed by Southern blot, genotyping (PCR) and RT-PCR.

381 The genomic DNA was extracted from ear punch and PCR genotyping was performed  
 382 as described previously (Dicer 2008). Primers used for PCR included:

383 5aF1 (forward) - ACAGCCTCTACCATCTCTCCACC

384 3aR4 (reverse) - AACACGAGTGAGTCACCTTCGC

385 The wild-type Nav1.7 allele and TAP tagged Nav1.7 allele gave a 170bp band and a  
 386 411bp band, respectively. The TAP tagged Nav1.7 mRNA was confirmed by RT-PCR.  
 387 Briefly, the total RNA was extracted from dorsal root ganglia with Qiagen RNeasy kit  
 388 (Qiagen) and 1.0 µg of total RNA was used to synthesize cDNA using Biorad cDNA  
 389 script-II synthesize kit with oligo-dT primer. The following primers were used to detect  
 390 mRNA of Nav1.7:

391 E25-26-F (forward) - CCGAGGCCAGGGAACAAATTCC

392 3'UTR-R (reverse) - GCCTGCGAAGGTGACTCACTCGTG

393 The wild-type and TAP tagged Nav1.7 alleles gave a 1521 bp band and a 1723 bp  
 394 band, respectively.

## 395 **Immunocytochemistry**

396 TAP tagged Nav1.7-HEK293 cells were plated on poly-D-lysine coated coverslips in  
 397 24-well plates and cultured at 37°C/5% CO<sub>2</sub> in DMEM supplemented with 10% foetal  
 398 bovine serum (Life Technologies), 50 U/ml penicillin, 50 µg/ml streptomycin and 0.2  
 399 mg/ml G418. 24 hours later, the cells were fixed in cooled methanol at -20°C for 10  
 400 minutes, and then permeabilised with cooled acetone at -20°C for 1 minute. After 3  
 401 washes with 1x PBS, the cells were incubated with blocking buffer containing 1x PBS,  
 402 0.3% Triton X-100 and 10% goat serum at room temperature for 30 minutes. Then the  
 403 fixed cells were incubated with anti-FLAG antibody (1:500 in blocking buffer, F1804,  
 404 Sigma) at 4°C overnight. After 3 washes with 1x PBS, the cells were incubated with  
 405 secondary antibody goat anti-mouse IgG conjugated with Alexa Fluor 488 (A11017,  
 406 Invitrogen) at room temperature for 2 hours. Then the coverslips were washed 3 times  
 407 in 1x PBS. The cells were mounted with VECTASHIELD HardSet Antifade Mounting  
 408 Medium with DAPI (H-1400, Vectorlabs) and visualized using a fluorescence Leica  
 409 microscope.

## 410 **Immunohistochemistry**

411 Following anesthesia, mice were transcardially perfused with PBS, followed by 1%  
 412 (w/v) paraformaldehyde in PBS. Brains and spinal cord were dissected and incubated  
 413 in fixative for 4 hours at 4°C, followed by 30% sucrose in PBS for 2 days at 4°C. Tissue  
 414 was embedded in O.C.T. (Tissue-Tek) and snap-frozen in a dry-ice/2-methylbutane  
 415 bath. Brain coronal and spinal cord cross cryosections (20 µm) were collected on glass  
 416 slides (Superfrost Plus, Polyscience) and stored at -80°C until further processing. For  
 417 Flag-tag immunohistochemistry, sections were incubated in blocking solution (4%  
 418 horse serum, 0.3% Triton X-100 in PBS) for 1 hour at room temperature, followed by

incubation in mouse anti-Flag antibody (F-1804, Sigma) diluted 1:200 in blocking solution for 2 days at 4°C. Following three washes in PBS, bound antibody was visualized using either an Alexa 488 or 594 conjugated goat anti mouse secondary antibody (1:800, Invitrogen). The IB4 staining in spinal cord has been described in a previous study (Zhao et al., 2010). To facilitate the identification of brain regions and the corresponding bregma levels, nuclei were counterstained with Hoechst 33342 (1:10,000, Invitrogen). Sections were mounted with a fluorescence mounting medium (DAKO). Fluorescence images were acquired on an epifluorescence microscope (BX61 attached to a DP71 camera, Olympus) or a confocal laser scanning microscope (LSM 780, Zeiss). Images were assembled and minimally adjusted in brightness and contrast using Adobe Photoshop Elements 10. Bregma levels and brain regions were identified according to the stereotaxic coordinates in “The Mouse Brain” atlas by Paxinos and Franklin 2001.

## **Behavioral analysis**

All behavioral tests were approved by the United Kingdom Home Office Animals (Scientific Procedures) Act 1986. Age (6-12 weeks) -matched KI mice (4 males and 3 females) and littermate wild-type (WT) controls (3 males and 4 females) were used for acute pain behaviour studies. The experimenters were blind to the genetic status of test animals. The Rotarod, Hargreaves', von Frey and Randall-Selitto tests were performed as described (Zhao et al., 2006). The Formalin test was carried by intraplantar injections of 20 µl of 5% formalin. The mice were observed for 45 minutes and the time spend biting and licking the injected paw were monitored and counted. Two phases were categorised, the first phase lasting 0 - 10 minutes and the second phase 10 - 45 min. All data are presented as mean ± SEM.

## Single-step and tandem affinity purification

In each round of sample preparation for single-step and tandem affinity purification, DRG, olfactory bulbs, spinal cord and hypothalamus samples were homogenized (Precellys ceramic kit 4.1, Peqlab) in 1% CHAPS (30 mM Tris-HCl pH 7.5; 150 mM NaCl, 1% CHAPS, 1 complete EDTA free Protease inhibitor cocktail (Roche) in 10 ml of CHAPS buffer) and further homogenized using an insulin syringe. The lysates were incubated shaking horizontally on ice and clarified by centrifugation at 14,000 g for 8 min at 4°C. Protein concentrations were measured using the BCA Protein Assay Kit (Pierce) and a total starting amount of 10 mg of protein containing supernatant was incubated with magnetic M-270 Epoxy Dynabeads (14311D, Invitrogen) covalently coupled to mouse Anti-Flag M2 (F-1804, Sigma). The coupling was carried out for 2 hours at 4°C using an end-over-end shaker. Magnetic Dynabeads were collected on a DynaMAG rack (Invitrogen) and washed three times in 1% CHAPS Buffer and 1x AcTEV protease cleavage buffer (50 mM Tris-HCl pH 8.0, 0.5 mM EDTA, 1 mM DTT, Invitrogen). Dynabead-captured Nav1.7 TAP-tag complex was released from the beads by incubation with AcTEV protease (Invitrogen) for 3 hours at 30°C, finalizing the single step purification. For the tandem affinity purification, protein eluates were collected after AcTEV cleavage and 15x diluted in protein binding buffer (50 mM Sodium phosphate, 300 mM NaCl, 10 mM imidazole, 0.01% Tween; pH 8.0). Nav1.7 TAP tag was captured using Ni-NTA beads (Qiagen). Ni-NTA beads were washed three times in protein binding buffer and incubated overnight at 4°C on an end-over-end shaker. TAP-tagged Nav1.7 protein complexes were released from the Ni-NTA beads by boiling in 1x SDS protein sample buffer.

## Western blot

Proteins were extracted from different tissues, such as DRG, spinal cord, olfactory bulbs and brain in 1% CHAPS lysis buffer. Samples for western blot were prepared by adding 3x Loading Buffer (Life Technologies) containing 5 mM DTT and denatured for 5 minutes at 95°C. 30µg of proteins were loaded in to precast gels (Bio-Rad) along with a multicolour spectra high range protein ladder (Thermo Scientific). Gels were placed in a gel tank and submerged in 1x Running Buffer. Samples were electrophoresed for between 1-3 hours, depending on size of protein of interest at 120 volts. Immobilon-P membrane (Millipore) was activated with methanol (Sigma) followed by wet transfer of proteins in 1x ice cold Transfer Buffer. Transfer was carried out for 1 hour at 100 volts. Membranes were then blocked using 5% Marvel dry milk in 1x PBS. Antibody incubation was performed overnight at 4°C. The membrane was then washed and incubated with HRP tagged secondary antibody in PBS containing 2.5% dry milk in 1x PBS, with agitation at room temperature. Membranes were then washed and the proteins were visualised using Super Signal West Dura Extended Duration Substrate (Thermo Scientific) on light sensitive film (GE Healthcare) and developed on a Konica Minolta (SRX-101A) medical film developer.

## Plasmids, cloning and primers

The following plasmids were obtained from Addgene (Cambridge, MA): Tmed10, Gprin1 and Lat1. In order to perform *in vitro* validation of Nav1.7 interaction with Synaptotagmin-2, we first cloned the human gene for insertion into a mammalian expression plasmid. Synaptotagmin-2 was cloned from human dorsal root ganglion neuronal tissue. Whole mRNA was first reverse transcribed into a cDNA library for PCR. Following insertion into a TOPO vector, this was then used as the template to

create the Synaptotagmin-2 insert, which was then successfully cloned into a pcDNA3.1 IRES-AcGFP plasmid using the Gibson assembly method. The Collapsin Response Mediator Protein 2 (Crmp2) gene was cloned from human dorsal root ganglia neuron mRNA and cloned into a pcDNA3.1 plasmid using Gibson assembly. The Scn3b mammalian expressing vector was used to investigate loss-of-function of Nav1.7 (Cox et al., 2006).

### **Co-immunoprecipitation (Co-IP)**

Mouse tissues used in immunoprecipitation experiments were chosen on the basis of known Nav1.7 expression, these include the following: Olfactory bulb, hypothalamus, spinal cord, dorsal root ganglia and sciatic nerve. All tissues from individual mice were either pooled or treated as individual tissue samples depending on experimental requirements. All tissues were flash frozen in dry ice immediately following dissection and stored at -80°C to avoid protein degradation. HEK293 cells stably expressing TAP-tagged Nav1.7 were harvested by trypsinisation followed by centrifugation at 800 rpm for 5 minutes. Cell pellets were stored at -80°C to avoid protein degradation. Samples were lysed in a 1% CHAPS lysis buffer containing a protease inhibitor cocktail and homogenised using ceramic zirconium oxide mix beads of 1.4 mm and 2.8 mm lysing kit and homogeniser (Precellys). A total of 10-25mg of protein was incubated with M2 Magnetic FLAG coupled beads (Sigma-Aldrich) for 2h at 4°C. The bead-protein complex was then washed with three cycles of 5 resin volumes of 1% CHAPS buffer and once with TEV-protease buffer (Invitrogen). The tagged protein was cleaved from the beads by the addition of TEV protease enzyme (Invitrogen) and incubated for 3 hours at 37°C to elute the protein complex. Sample eluate was then separated from the beads and stored at -80°C.

## Liquid chromatography-tandem mass spectrometry (LC-MS/MS) analysis

Proteins cleaved from Ni-NTA beads after affinity purification were tryptic digested following a FASP protocol (Wisniewski et al., 2009). In brief, proteins were loaded to 30 KDa filters (Millipore), then filter units were centrifuged at 14,000g for 15 min to remove other detergents. Two hundred  $\mu$ l of urea buffer (10 mM dithiolthreitol 8M urea (Sigma) in 0.1 M Tris/HCl pH 8.5) were added to the filters and left at room temperature for 1 hour to reduce proteins. The filters were centrifuged to remove dithiolthreitol. Two hundred  $\mu$ l of 50 mM iodoacetamide in urea buffer were added to filters and left 30 min in the dark. The filters were centrifuged as before to remove IAA. Then the samples were buffer exchanged twice using 200  $\mu$ l of urea buffer, and one more time using 200  $\mu$ l of 50 mM  $\text{NH}_4\text{HCO}_3$  in water. Forty  $\mu$ l of 50 ng/ $\mu$ l trypsin in 50 mM  $\text{NH}_4\text{HCO}_3$  were added to filter, filters were vortexed briefly and proteins were digested at 37 °C for overnight. After tryptic digestion, the filters were transferred to new collection tubes, and the peptides collected by placing the filter upside down and spinning. The samples were acidified with  $\text{CF}_3\text{COOH}$  and desalted with C18 cartridge (Waters). The pure peptides were dried by Spedvac (Millipore) and resuspended with 20  $\mu$ l of 2% ACN, 0.1% FA. Five  $\mu$ l of samples were injected into Orbitrap velos mass spectrometry (Thermo) coupled to a UPLC (Waters) (Thézénas et al., 2013).

LC-MS/MS analysis was carried out by nano-ultra performance liquid chromatography tandem MS (nano-UPLC-MS/MS) using a 75  $\mu$ m-inner diameter x 25 cm C18 nanoAcquity UPLC<sup>TM</sup> column (1.7- $\mu$ m particle size, Waters) with a 180 min gradient of 3 – 40% solvent B (solvent A: 99.9%  $\text{H}_2\text{O}$ , 0.1% formic acid; solvent B: 99.9% ACN, 0.1% Formic acid). The Waters nanoAcquity UPLC system (final flow rate, 250 nl/min) was coupled to a LTQ Orbitrao Velos (Thermo Scientific, USA) run in positive ion



mode. The MS survey scan was performed in the FT cell recoding a window between 300 and 2000 m/z. the resolution was set to 30,000. Maximum of 20 MS/MS scans were triggered per MS scan. The lock mass option was enabled and Polysiloxane (m/z 371.10124) was used for internal recalibration of the mass spectra. CID was done with a target value of 30,000 in the linear ion trap. The samples were measured with the MS setting charge state rejection enabled and only more than 1 charges procures ions selected for fragmentation. All raw MS data were processed to generate MGF files (200 most intense peaks) using the Proteowizard v.2.1.2476 software. The identification of proteins was performed using MGF files with the central proteomics facilities pipeline. Mus musculus (Mouse) database containing entries from UniProtKB was used in CPF Proteomics pipeline for data analysis. This pipeline combines database search results from three search engines (Mascot, OMSSA and X!tandem k-score). The search was carried out using the following parameters. Trypsin was the enzyme used for the digestion of the proteins and only one missed cleavage was allowed. The accepted tolerance for the precursor was 20 ppm and 0.5 Da for the fragment. The search encompassed 1+, 2+ and 3+ charge state, fixed modification for cysteine carbamidomethyl and variable modification for asparagine and glutamine deamidation, and methionine oxidation. All trypsin fragments were added to an exclusion list. False discovery rate was calculated by peptide/proteinprophet or estimated empirically from decoy hits, identified proteins were filtered to an estimated 1% FDR. The label-free analysis was carried out using the normalized spectral index (SINQ) (Trudgian et al., 2011). The mass spectrometry proteomics data have been deposited to the ProteomeXchange Consortium (<http://www.proteomexchange.org/>) via the PRIDE (Vizcaíno et al., 2016) partner repository with the dataset identifier PXD004926.



## 563 Electrophysiology and patch clamp recordings

564 Whole cell patch clamp recordings were conducted at room temperature (21°C) using  
 565 an AxoPatch 200B amplifier and a Digidata 1322A digitizer (Axon Instruments),  
 566 controlled by Clampex software (version 10, Molecular Devices). Filamented  
 567 borosilicate microelectrodes (GC150TF-10, Harvard Apparatus) were pulled on a  
 568 Model P-97 Flaming/Brown micropipette puller (Sutter Instruments) and fire polished  
 569 to a resistance of between 2.5-4 MOhm. Standard pipette intracellular solution  
 570 contained: 10 mM NaCl, 140 mM CsF, 1.1 mM EGTA, 1 mM MgCl<sub>2</sub>, and 10 mM  
 571 HEPES. The standard bathing extracellular solution contained: 140 mM NaCl, 1 mM  
 572 MgCl<sub>2</sub>, 3 mM KCl, 1 mM CaCl<sub>2</sub> and 10 mM HEPES. Both intracellular and extracellular  
 573 solutions were adjusted to a physiological pH of 7.3. The amplifier's offset potential  
 574 was zeroed when the electrode was placed in the solution. After a gigaseal was  
 575 obtained, short suction was used to establish whole-cell recording configuration.  
 576 Errors in series resistance were compensated by 70 to 75%. Cells were briefly washed  
 577 with extracellular solution before a final 2 mL of solution was transferred to the dish.  
 578 Cells were held at -100 mV for 2 minutes before experimental protocols were initiated.  
 579 Currents were elicited by 50 ms depolarisation steps from -80mV to + 80mV in 5mV  
 580 increments. Compounds were added and mixed at the desired concentrations in  
 581 extracellular solution before being added to the bath. Following addition of the  
 582 compound protocols were repeated on previously unrecorded cells. All currents were  
 583 leak subtracted using a p/4 protocol. The following compounds were used in  
 584 electrophysiology experiments: Lacosamide ((R)-2-acetamido-N-benzyl-3-  
 585 methoxypropionamide) was obtained from Toronto Research Chemicals Inc  
 586 (L098500) and Tetrodotoxin was obtained from Sigma-Aldrich (T8024). Incubation  
 587 with Lacosamide was done for 5 hours prior to recording.

Voltage-clamp experiments were analysed using cCLAMP software and Origin (OriginLab Corp., Northampton, MA) software programs. Current density-voltage (pA/pF) analysis by measuring peak currents at different applied voltage steps and normalised to cell capacitance. Voltage dependent activation data was fitted to a Boltzmann equation  $y = (A2 + (A1 - A2)/(1 + \exp((Vh - x)/k))) * (x - Vrev)$ , where A1 is the maximal amplitude, Vh is the potential of half-maximal activation, x is the clamped membrane potential, Vrev is the reversal potential, and k is a constant. All Boltzmann equations were fitted using ORIGIN software.

### **Nav1.7 interaction protein selection and function analysis**

Candidate proteins that may interact with Nav1.7 were selected by two criteria: a) Present in at least two knock-in biological experiments but absent from wild type experiments. b) Present in more than three knock-in and more than one wild type experiments, the ratio of average abundance is more than 1.5 fold increased in knock-in experiments as compared with wild type experiments. Further cellular component and function classification were performed on PANTHER Classification System (11.0). Ingenuity pathway analysis (IPA) (QIAGEN) was used to elucidate pathways and protein interaction networks using candidate proteins.

### **Southern blot analysis**

The genomic DNA was extracted from either ES cells or tails of mice following the procedures as described (Sambrook and Russell, 2001). The probes for Southern blot were amplified by PCR using mouse genomic DNA isolated from C57BL/6 as a template and purified with a Qiagen Gel Purification Kit. The restriction enzymes *StuI*, *BspHI* and *PsiI* were used to digest genomic DNA for either wild-type and knock-in

bands. The sizes of wild-type and knock-in bands is shown in Fig 2B. The primers used to create probes (5' external probe: 768 bp; 3' external probe: 629 bp) included:

5'PF (5'probe, forward) - ACCAAGCTTTTGATATCACCATCAT

5'PR (5'probe, reverse) - CAACTCGAGAACAGGTAAGACATGACAGTG

3'PF (3'probe, forward) - TTTAAGCTTCCTGCCCCTATTCCTGCT

3'PR (5'probe, reverse) – TTAGGATCCATGCACTACTGACTTGCTTATAGGT

## Statistical Analysis

Statistical analysis was performed using either repeated-measures ANOVA with Bonferroni post hoc testing or Unpaired Student's *t*-test as described in the results or figure legends. The GraphPad Prism 6.0 was used to perform the statistical analysis. All data are presented as mean ± SEM and significance was determined at  $p < 0.05$ .

## Acknowledgments

We are grateful to Professor Seth GN Grant and Dr. Esperanza Fernandez for the TAP-tag plasmids. We thank the Mass Spectrometry Laboratory of Target Discovery Institute at University of Oxford for performing the Mass spectrometry analysis. We thank Dr. Massimo Signore who performed electroporation and blastocysts microinjection of ES cells in JP Martinez-Barbera's research group, ICH, UCL. This study was supported by the Wellcome Collaborative Award 200183/Z/15/Z (to J.W., J.Z., J.C. and S.G.) and Investigator Award 101054/Z/13/Z (to J.W.), the Medical Research Council (MRC) Grant G091905 (to J.W.) and MRC CDA G1100340 (to J.C.), the Deutsche Forschungsgemeinschaft Grants SFB 894/A17 (to F.Z.) and PY90/1-1 (to M.P.).

## 633 **Competing Interests**

634 The authors declare no competing interests.

## References

- ANGRAND, P.-O., SEGURA, I., VOELKEL, P., GHIDELLI, S., TERRY, R., BRAJENOVIC, M.,  
VINTERSTEN, K., KLEIN, R., SUPERTI-FURGA, G., DREWES, G., KUSTER, B.,  
BOUWMEESTER, T. & ACKER-PALMER, A. 2006. Transgenic mouse proteomics  
identifies new 14-3-3-associated proteins involved in cytoskeletal rearrangements  
and cell signaling. *Molecular & Cellular Proteomics*, 5, 2211-2227.
- BAO, L. 2015. Trafficking regulates the subcellular distribution of voltage-gated sodium  
channels in primary sensory neurons. *Mol Pain*, 11, 61.
- BENCE, M., ARBUCKLE, M. I., DICKSON, K. S. & GRANT, S. G. 2005. Analyses of murine  
postsynaptic density-95 identify novel isoforms and potential translational control  
elements. *Molecular brain research*, 133, 143-152.
- BLACK, J. A., FRÉZEL, N., DIB-HAJJ, S. D. & WAXMAN, S. G. 2012. Expression of Nav1. 7 in  
DRG neurons extends from peripheral terminals in the skin to central preterminal  
branches and terminals in the dorsal horn. *Molecular pain*, 8, 82.
- BONNON, C., WENDELER, M. W., PACCAUD, J.-P. & HAURI, H.-P. 2010. Selective export of  
human GPI-anchored proteins from the endoplasmic reticulum. *J Cell Sci*, 123, 1705-  
1715.
- BRANCO, T., TOZER, A., MAGNUS, C. J., SUGINO, K., TANAKA, S., LEE, A. K., WOOD, J. N. &  
STERNSON, S. M. 2016. Near-Perfect Synaptic Integration by Na v 1.7 in  
Hypothalamic Neurons Regulates Body Weight. *Cell*, 165, 1749-1761.
- CATTERALL, W. A. 2010. Signaling complexes of voltage-gated sodium and calcium channels.  
*Neurosci Lett*, 486, 107-16.
- CHAPMAN, E. R. 2002. Synaptotagmin: a Ca<sup>2+</sup> sensor that triggers exocytosis? *Nature  
Reviews Molecular Cell Biology*, 3, 498-508.
- CHEN-IZU, Y., SHAW, R. M., PITT, G. S., YAROV-YAROVY, V., SACK, J. T., ABRIEL, H.,  
ALDRICH, R. W., BELARDINELLI, L., CANNELL, M. B., CATTERALL, W. A., CHAZIN, W. J.,  
CHIAMVIMONVAT, N., DESCHENES, I., GRANDI, E., HUND, T. J., IZU, L. T., MAIER, L. S.,  
MALTSEV, V. A., MARIONNEAU, C., MOHLER, P. J., RAJAMANI, S., RASMUSSEN, R. L.,  
SOBIE, E. A., CLANCY, C. E. & BERS, D. M. 2015. Na<sup>+</sup> channel function, regulation,  
structure, trafficking and sequestration. *J Physiol*, 593, 1347-60.
- CHEN, G. I. & GINGRAS, A. C. 2007. Affinity-purification mass spectrometry (AP-MS) of  
serine/threonine phosphatases. *Methods*, 42, 298-305.
- COX, J. J., REIMANN, F., NICHOLAS, A. K., THORNTON, G., ROBERTS, E., SPRINGELL, K.,  
KARBANI, G., JAFRI, H., MANNAN, J., RAASHID, Y., AL-GAZALI, L., HAMAMY, H.,  
VALENTE, E. M., GORMAN, S., WILLIAMS, R., MCHALE, D. P., WOOD, J. N., GRIBBLE, F.  
M. & WOODS, C. G. 2006. An SCN9A channelopathy causes congenital inability to  
experience pain. *Nature*, 444, 894-8.
- CUSDIN, F. S., CLARE, J. J. & JACKSON, A. P. 2008. Trafficking and cellular distribution of  
voltage-gated sodium channels. *Traffic*, 9, 17-26.
- DIB-HAJJ, S. D., YANG, Y., BLACK, J. A. & WAXMAN, S. G. 2013. The Na(V)1.7 sodium channel:  
from molecule to man. *Nat Rev Neurosci*, 14, 49-62.
- DUSTRUDE, E. T., WILSON, S. M., JU, W. N., XIAO, Y. C. & KHANNA, R. 2013. CRMP2 Protein  
SUMOylation Modulates Nav1.7 Channel Trafficking. *Journal of Biological Chemistry*,  
288, 24316-24331.

- EMERY, E. C., LUIZ, A. P. & WOOD, J. N. 2016. Nav1. 7 and other voltage-gated sodium channels as drug targets for pain relief. *Expert opinion on therapeutic targets*, 1-9.
- FERNANDEZ, E., COLLINS, M. O., UREN, R. T., KOPANITSA, M. V., KOMIYAMA, N. H., CRONING, M. D., ZOGRAFOS, L., ARMSTRONG, J. D., CHOUDHARY, J. S. & GRANT, S. G. 2009. Targeted tandem affinity purification of PSD-95 recovers core postsynaptic complexes and schizophrenia susceptibility proteins. *Molecular systems biology*, 5, 269.
- FRANK, H. Y. & CATTERALL, W. A. 2003. Overview of the voltage-gated sodium channel family. *Genome biology*, 4, 1.
- GE, X., QIU, Y., LOH, H. H. & LAW, P.-Y. 2009. GRIN1 regulates  $\mu$ -opioid receptor activities by tethering the receptor and G protein in the lipid raft. *Journal of Biological Chemistry*, 284, 36521-36534.
- HABIB, A. M., WOOD, J. N. & COX, J. J. 2015. Sodium channels and pain. *Pain Control*. Springer.
- HERZOG, R. I., LIU, C., WAXMAN, S. G. & CUMMINS, T. R. 2003. Calmodulin binds to the C terminus of sodium channels Nav1. 4 and Nav1. 6 and differentially modulates their functional properties. *The Journal of neuroscience*, 23, 8261-8270.
- HO, C., ZHAO, J., MALINOWSKI, S., CHAHINE, M. & O'LEARY, M. E. 2012. Differential expression of sodium channel beta subunits in dorsal root ganglion sensory neurons. *J Biol Chem*, 287, 15044-53.
- KEILHAUER, E. C., HEIN, M. Y. & MANN, M. 2015. Accurate Protein Complex Retrieval by Affinity Enrichment Mass Spectrometry (AE-MS) Rather than Affinity Purification Mass Spectrometry (AP-MS). *Molecular & Cellular Proteomics*, 14, 120-135.
- KLUGBAUER, N., LACINOVA, L., FLOCKERZI, V. & HOFMANN, F. 1995. Structure and functional expression of a new member of the tetrodotoxin-sensitive voltage-activated sodium channel family from human neuroendocrine cells. *The EMBO journal*, 14, 1084.
- KOENIG, J., WERDEHAUSEN, R., LINLEY, J. E., HABIB, A. M., VERNON, J., LOLIGNIER, S., EIJKELKAMP, N., ZHAO, J., OKOROKOV, A. L., WOODS, C. G., WOOD, J. N. & COX, J. J. 2015. Regulation of Nav1.7: A Conserved SCN9A Natural Antisense Transcript Expressed in Dorsal Root Ganglia. *PLoS One*, 10, e0128830.
- KUKKAR, A., BALI, A., SINGH, N. & JAGGI, A. S. 2013. Implications and mechanism of action of gabapentin in neuropathic pain. *Archives of pharmacol research*, 36, 237-251.
- LAEDERMANN, C. J., ABRIEL, H. & DECOSTERD, I. 2015. Post-translational modifications of voltage-gated sodium channels in chronic pain syndromes. *Front Pharmacol*, 6, 263.
- LAEDERMANN, C. J., CACHEMAILLE, M., KIRSCHMANN, G., PERTIN, M., GOSSELIN, R. D., CHANG, I., ALBESA, M., TOWNE, C., SCHNEIDER, B. L., KELLENBERGER, S., ABRIEL, H. & DECOSTERD, I. 2013. Dysregulation of voltage-gated sodium channels by ubiquitin ligase NEDD4-2 in neuropathic pain. *J Clin Invest*, 123, 3002-13.
- LETERRIER, C., BRACHET, A., FACHE, M. P. & DARGENT, B. 2010. Voltage-gated sodium channel organization in neurons: Protein interactions and trafficking pathways. *Neuroscience Letters*, 486, 92-100.
- LIU, P., JENKINS, N. A. & COPELAND, N. G. 2003. A highly efficient recombineering-based method for generating conditional knockout mutations. *Genome research*, 13, 476-484.
- LUO, W., WANG, Y. & REISER, G. 2011. Proteinase-activated receptors, nucleotide P2Y receptors, and  $\mu$ -opioid receptor-1B are under the control of the type I

- transmembrane proteins p23 and p24A in post-Golgi trafficking. *Journal of neurochemistry*, 117, 71-81.
- MCEWEN, D. P. & ISOM, L. L. 2004. Heterophilic interactions of sodium channel  $\beta$ 1 subunits with axonal and glial cell adhesion molecules. *Journal of Biological Chemistry*, 279, 52744-52752.
- MEADOWS, L. S. & ISOM, L. L. 2005. Sodium channels as macromolecular complexes: Implications for inherited arrhythmia syndromes. *Cardiovascular Research*, 67, 448-458.
- MINETT, M. S., NASSAR, M. A., CLARK, A. K., PASSMORE, G., DICKENSON, A. H., WANG, F., MALCANGIO, M. & WOOD, J. N. 2012. Distinct Nav1.7-dependent pain sensations require different sets of sensory and sympathetic neurons. *Nature communications*, 3, 791.
- MINETT, M. S., PEREIRA, V., SIKANDAR, S., MATSUYAMA, A., LOLIGNIER, S., KANELLOPOULOS, A. H., MANCINI, F., IANNETTI, G. D., BOGDANOV, Y. D., SANTANA-VARELA, S., MILLET, Q., BASKOZOS, G., MACALLISTER, R., COX, J. J., ZHAO, J. & WOOD, J. N. 2015. Endogenous opioids contribute to insensitivity to pain in humans and mice lacking sodium channel Nav1.7. *Nat Commun*, 6, 8967.
- NAHIN, R. L. 2015. Estimates of pain prevalence and severity in adults: United States, 2012. *The Journal of Pain*, 16, 769-780.
- NAMADURAI, S., BALASURIYA, D., RAJAPPA, R., WIEMHOFER, M., STOTT, K., KLINGAUF, J., EDWARDSON, J. M., CHIRGADZE, D. Y. & JACKSON, A. P. 2014. Crystal structure and molecular imaging of the Nav channel beta3 subunit indicates a trimeric assembly. *J Biol Chem*, 289, 10797-811.
- NAMADURAI, S., YEREDDI, N. R., CUSDIN, F. S., HUANG, C. L., CHIRGADZE, D. Y. & JACKSON, A. P. 2015. A new look at sodium channel beta subunits. *Open Biol*, 5, 140192.
- NASSAR, M. A., STIRLING, L. C., FORLANI, G., BAKER, M. D., MATTHEWS, E. A., DICKENSON, A. H. & WOOD, J. N. 2004. Nociceptor-specific gene deletion reveals a major role for Na(v)1.7 (PN1) in acute and inflammatory pain. *Proceedings of the National Academy of Sciences of the United States of America*, 101, 12706-12711.
- OEFFINGER, M. 2012. Two steps forward one step back: Advances in affinity purification mass spectrometry of macromolecular complexes. *Proteomics*, 12, 1591-1608.
- OKA, Y., YE, M. & ZUKER, C. S. 2015. Thirst driving and suppressing signals encoded by distinct neural populations in the brain. *Nature*, 520, 349-352.
- RATCLIFFE, C. F., WESTENBROEK, R. E., CURTIS, R. & CATTERALL, W. A. 2001. Sodium channel beta 1 and beta 3 subunits associate with neurofascin through their extracellular immunoglobulin-like domain. *Journal of Cell Biology*, 154, 427-434.
- RUSH, A. M., CUMMINS, T. R. & WAXMAN, S. G. 2007. Multiple sodium channels and their roles in electrogenesis within dorsal root ganglion neurons. *The Journal of physiology*, 579, 1-14.
- SAMBROOK, J. & RUSSELL, D. W. 2001. Molecular cloning: a laboratory manual 3rd edition. *Coldspring-Harbour Laboratory Press, UK*.
- SAMPO, B., TRICAUD, N., LEVEQUE, C., SEAGAR, M., COURAUD, F. & DARGENT, B. 2000. Direct interaction between synaptotagmin and the intracellular loop I-II of neuronal voltage-sensitive sodium channels. *Proceedings of the National Academy of Sciences*, 97, 3666-3671.
- SHAO, D., BAKER, M. D., ABRAHAMSEN, B., RUGIERO, F., MALIK-HALL, M., POON, W. Y., CHEAH, K. S., YAO, K. M., WOOD, J. N. & OKUSE, K. 2009. A multi PDZ-domain protein



Pdzd2 contributes to functional expression of sensory neuron-specific sodium channel Na(V)1.8. *Mol Cell Neurosci*, 42, 219-25.

SHEETS, P. L., GERNER, P., WANG, C.-F., WANG, S.-Y., WANG, G. K. & CUMMINS, T. R. 2006. Inhibition of Nav1. 7 and Nav1. 4 sodium channels by trifluoperazine involves the local anesthetic receptor. *Journal of neurophysiology*, 96, 1848-1859.

SRINIVASAN, J., SCHACHNER, M. & CATTERALL, W. A. 1998. Interaction of voltage-gated sodium channels with the extracellular matrix molecules tenascin-C and tenascin-R. *Proceedings of the National Academy of Sciences*, 95, 15753-15757.

TERPE, K. 2003. Overview of tag protein fusions: from molecular and biochemical fundamentals to commercial systems. *Appl Microbiol Biotechnol*, 60, 523-33.

THÉZÉNAS, M. L., HUANG, H., NJIE, M., RAMAPRASAD, A., NWAKANMA, D. C., FISCHER, R., DIGLERIA, K., WALTHER, M., CONWAY, D. J. & KESSLER, B. M. 2013. PfHPRT: a new biomarker candidate of acute Plasmodium falciparum infection. *Journal of proteome research*, 12, 1211-1222.

TOLEDO-ARAL, J. J., MOSS, B. L., HE, Z.-J., KOSZOWSKI, A. G., WHISENAND, T., LEVINSON, S. R., WOLF, J. J., SILOS-SANTIAGO, I., HALEGOUA, S. & MANDEL, G. 1997. Identification of PN1, a predominant voltage-dependent sodium channel expressed principally in peripheral neurons. *Proceedings of the National Academy of Sciences*, 94, 1527-1532.

TRUDGIAN, D. C., RIDLOVA, G., FISCHER, R., MACKEEN, M. M., TERNETTE, N., ACUTO, O., KESSLER, B. M. & THOMAS, B. 2011. Comparative evaluation of label-free SING normalized spectral index quantitation in the central proteomics facilities pipeline. *Proteomics*, 11, 2790-2797.

VETRIVEL, K. S., GONG, P., BOWEN, J. W., CHENG, H., CHEN, Y., CARTER, M., NGUYEN, P. D., PLACANICA, L., WIELAND, F. T. & LI, Y.-M. 2007. Dual roles of the transmembrane protein p23/TMP21 in the modulation of amyloid precursor protein metabolism. *Molecular neurodegeneration*, 2, 1.

VIZCAÍNO, J. A., CSORDAS, A., DEL-TORO, N., DIANES, J. A., GRISS, J., LAVIDAS, I., MAYER, G., PEREZ-RIVEROL, Y., REISINGER, F. & TERNENT, T. 2016. 2016 update of the PRIDE database and its related tools. *Nucleic acids research*, 44, D447-D456.

WEISS, J., PYRSKI, M., JACOBI, E., BUFE, B., WILLNECKER, V., SCHICK, B., ZIZZARI, P., GOSSAGE, S. J., GREER, C. A., LEINDERS-ZUFALL, T., WOODS, C. G., WOOD, J. N. & ZUFALL, F. 2011. Loss-of-function mutations in sodium channel Nav1.7 cause anosmia. *Nature*, 472, 186-90.

WILDBURGER, N. C., ALI, S. R., HSU, W.-C. J., SHAVKUNOV, A. S., NENOV, M. N., LICHTI, C. F., LEDUC, R. D., MOSTOVENKO, E., PANOVA-ELEKTRONOVA, N. I., EMMETT, M. R., NILSSON, C. L. & LAEZZA, F. 2015. Quantitative Proteomics Reveals Protein-Protein Interactions with Fibroblast Growth Factor 12 as a Component of the Voltage-Gated Sodium Channel 1.2 (Nav1.2) Macromolecular Complex in Mammalian Brain. *Molecular & Cellular Proteomics : MCP*, 14, 1288-1300.

WILSON, S. M. & KHANNA, R. 2015. Specific binding of lacosamide to collapsin response mediator protein 2 (CRMP2) and direct impairment of its canonical function: implications for the therapeutic potential of lacosamide. *Molecular neurobiology*, 51, 599-609.

WISNIEWSKI, J. R., ZOUGMAN, A., NAGARAJ, N. & MANN, M. 2009. Universal sample preparation method for proteome analysis. *Nature methods*, 6, 359.



- WOODCOCK, J. 2009. A Difficult Balance — Pain Management, Drug Safety, and the FDA.  
*New England Journal of Medicine*, 361, 2105-2107.
- YANG, L., DONG, F., YANG, Q., YANG, P. F., WU, R., WU, Q. F., WU, D., LI, C. L., ZHONG, Y. Q.,  
LU, Y. J., CHENG, X., XU, F. Q., CHEN, L., BAO, L. & ZHANG, X. 2017. FGF13 Selectively  
Regulates Heat Nociception by Interacting with Nav1.7. *Neuron*.
- ZHAO, J., LEE, M.-C., MOMIN, A., CENDAN, C.-M., SHEPHERD, S. T., BAKER, M. D., ASANTE,  
C., BEE, L., BETHRY, A., PERKINS, J. R., NASSAR, M. A., ABRAHAMSEN, B., DICKENSON,  
A., COBB, B. S., MERKENSCHLAGER, M. & WOOD, J. N. 2010. Small RNAs Control  
Sodium Channel Expression, Nociceptor Excitability, and Pain Thresholds. *Journal of  
Neuroscience*, 30, 10860-10871.
- ZHAO, J., SEEREERAM, A., NASSAR, M. A., LEVATO, A., PEZET, S., HATHAWAY, G.,  
MORENILLA-PALAO, C., STIRLING, C., FITZGERALD, M., MCMAHON, S. B., RIOS, M.,  
WOOD, J. N. & LONDON PAIN, C. 2006. Nociceptor-derived brain-derived  
neurotrophic factor regulates acute and inflammatory but not neuropathic pain.  
*Molecular and Cellular Neuroscience*, 31, 539-548.

## Figure Legends

### Figure 1. Characterisation of TAP-tagged Nav1.7 in HEK293 cells.

- A The diagram of TAP-tagged *SCN9A* cDNA construct used to establish the stably expressing TAP-tagged Nav1.7 HEK293 cell line. A sequence encoding a TAP tag was cloned immediately upstream of the stop codon of *SCN9A* coding the wild-type Nav1.7.
- B Left panel: Representative immunohistochemistry with an anti-FLAG antibody on HEK293 cells stably expressing TAP-tagged Nav1.7 (green). Right panel: The cell nuclei were co-stained with DAPI (blue). Scale bar = 25  $\mu$ m.
- C Representative current traces recorded from HEK293 cells stably expressing either the wild-type Nav1.7 or the TAP-tagged Nav1.7 in response to depolarisation steps from -100 to 40 mV.
- D Left panel: I(V) curves obtained in Nav1.7 and TAP-tagged Nav1.7 expressing cells using the same protocol as in (c), showing no significant difference in voltage of half-maximal activation ( $V_{1/2}$ ;  $-9.54 \pm 1.08$  mV for Nav1.7,  $n = 10$ ; and  $-8.12 \pm 1.07$  mV for TAP-tagged Nav1.7,  $n = 14$ ;  $p = 0.3765$ , Student's *t*-test) and reversal potential ( $V_{rev}$ ;  $61.73 \pm 3.35$  mV for Nav1.7,  $n = 10$ ; and  $-8.12 \pm 1.07$  mV for TAP-tagged Nav1.7,  $n = 14$ ;  $p = 0.9114$ , Student's *t*-test). Right panel: Voltage dependence of fast inactivation, assessed by submitting the cells to a 500 ms prepulse from -130 to -10 mV prior to depolarization at -10 mV. No significant difference in the voltage of half inactivation was observed between the two cell lines ( $V_{1/2}$  of  $-64.58 \pm 1.32$  mV for Nav1.7,  $n = 10$ ; and  $-64.39 \pm 1.06$  for TAP-tagged Nav1.7,  $n = 14$ ;  $p = 0.9100$ , Student's *t*-test).

### Figure 2. Generation of TAP-tagged Nav1.7 knock-in mice.

- A The location of TAP tag in the Nav1.7 locus. A sequence encoding a TAP tag peptide comprised of a HAT domain, TEV cleavage site and 3 FLAG-tags was inserted immediately prior to the stop codon (indicated as a star) at the extreme C-terminus of Nav1.7.

862 B Schematic diagrams of the targeting strategy. White boxes represent Nav1.7  
 863 exons (exon numbers are indicated on the box), grey box represents TAP tag,  
 864 thick black lines represent homologous arms, and the small triangle box  
 865 represents the single LoxP site, respectively. The positions of the external  
 866 probes used for Southern blotting are indicated in the diagram. Neomycin (neo),  
 867 DTA expression cassettes and restriction enzyme sites and expected fragment  
 868 sizes for Southern blotting are also indicated.

869 C Southern blot analysis of genomic DNA from Founder 1 mice (TAP-tagged  
 870 Nav1.7 carrying the neo cassette). Genomic DNA was digested with *StuI* and  
 871 was then hybridized with either 5' or 3' external probe. Wild-type (WT) allele was  
 872 detected as a 13.8 kb fragment using either 5' or 3' probes. Knock-in allele (KI)  
 873 was detected as either a 6.6 kb (5' probe) or a 7.3 kb (3' probe) fragment.

874 D Southern blot analysis of TAP-tagged Nav1.7 allele after Cre recombination.  
 875 Genomic DNA was digested either with *BspHI* or *PsiI*, and was then hybridized  
 876 with either 5' (*BspHI*) or 3' (*PsiI*) external probe. WT alleles were detected as 5.8  
 877 kb (5' probe) and 8.4 kb (3' probe) fragments, respectively. The neo-deleted  
 878 TAP-tagged Nav1.7 alleles were detected as 4.5 kb (5' probe) and 6.1 kb (3'  
 879 probe) fragments, respectively.

880 E Genotyping analysis by PCR. Representative result of the PCR screening of  
 881 Nav1.7<sup>TAP</sup> mice showing the 411 bp band (KI allele) and the 170 bp band (WT  
 882 allele). The location of primers used for PCR are indicated with black arrows.

883 F TAP-tagged Nav1.7 expression analysis with RT-PCR. Total RNA was isolated  
 884 from DRG of Nav1.7<sup>TAP</sup> mice and cDNA synthesis was primed using oligo-dT.  
 885 PCR was performed with the primers indicated with black arrows. A 1.5 kb WT

band and a 1.8 kb KI band were detected from either littermate WT control animals or Nav1.7<sup>TAP</sup> KI mice, respectively.

### **Figure 3. Pain behavior tests.**

- A Rotarod test showed no motor deficits in TAP-tagged Nav1.7 animals (n = 7, WT; n = 7, KI;  $p = 0.8619$ , Student's *t*-test).
- B Responses to low-threshold mechanical stimulation by von Frey filaments were normal in the KI mice ( $p = 0.9237$ , Student's *t*-test).
- C Hargreaves' apparatus demonstrated identical latencies of response to thermal stimulation (n = 7, WT; n = 7, KI;  $p = 0.3038$ , Student's *t*-test).
- D Acute mechanical pressure applied with the Randall-Selitto apparatus demonstrated identical behavior in KI and WT mice (n = 7, WT; n = 7, KI;  $p = 0.7124$ , Student's *t*-test).
- E Formalin test. Licking/biting response to acute peripheral inflammation induced by intraplantar injection of 5% formalin in hind-paw was recorded. Left panel, the time course of development of the response of KI mice (black squares) and WT littermate controls (white squares) showed similar response patterns (n = 10, WT; n = 7, KI;  $p = 0.2226$ , two-way ANOVA). Right panel, the early (0 - 10 minutes) and late (10 - 45 minutes) phases of the formalin response in KI and WT mice showed similar responses ( $p = 0.1690$ , 1<sup>st</sup> phase;  $p = 0.5017$ , 2<sup>nd</sup> phase; Student's *t*-test) between KI and WT mice.

### **Figure 4. Immunohistochemistry of FLAG-tag expression in the central nervous system (CNS).**

- A-D In the main olfactory bulb (MOB), FLAG-tag expression (in green) is visible in the olfactory nerve layer (ONL) and in the glomerular layer (GL) in TAP-tagged Nav1.7 knock-in mice (KI) but not in the littermate wild-type controls (WT). In the posterior olfactory bulb, staining is also evident in the (C) accessory

911 olfactory bulb (AOB). Staining is absent in the (D) MOB and AOB of wild-type  
912 control mice.

913 E-F FLAG-tag expression is present in the medial habenula (MHb, arrow), the  
914 anterodorsal thalamic nucleus (AD, arrow), the laterodorsal thalamic nucleus  
915 (LD, dotted line), and (F) in the subfornical organ (SFO, arrow) located in the  
916 roof of the dorsal third ventricle.

917 G-I FLAG-tag expression is present in neurons of the posterodorsal aspect of the  
918 medial amygdala (MePD, arrow, dotted line) and in the hypothalamus in  
919 neurons of the arcuate nucleus (Arc, arrow, dotted line).

920 J-L FLAG-tag expression is present (J) in neurons of the substantia nigra reticular  
921 part (SNR) and (K) the red nucleus magnocellular part (RMC) of the midbrain,  
922 and (L) in neurons of the pontine nuclei (Pn) located in the hindbrain. cp,  
923 cerebral peduncle; CTX, cortex; DM, dorsomedial hypothalamic nucleus; EPL,  
924 external plexiform layer; ME, median eminence; opt, optic tract; sm, stria  
925 medullaris; TH, thalamus; VMH, ventromedial hypothalamic nucleus; 3V, third  
926 ventricle.

927 M-N The cross section of lumbar spinal cord (L4) is labelled with anti-FLAG (in red).  
928 FLAG tag expression is present in laminae I, II and III in spinal cord of KI mice  
929 (N) but not in spinal cord of WT mice (M).

930 O The cross sections of spinal cord of KI mice were co-stained with Laminae II  
931 marker IB4 (o, in green).

932 Sketches on the left illustrate the CNS regions and bregma levels (in mm) of  
933 the fluorescence images shown on the right. Scale bars: 500  $\mu$ m (A, C, D, G);  
934 250  $\mu$ m (E, J, K, M-O); 100  $\mu$ m (B, F, I, L); 50  $\mu$ m (H).

**Figure 5. Optimisation of single-step and tandem affinity purification, validation of identified protein-protein interactors and tissue expression pattern of TAP-tagged Nav1.7 in Nav1.7<sup>TAP</sup> mice.**

- A Schematic illustrating the affinity purification (ss-AP and TAP) procedure using the tandem affinity tags separated with a TEV cleavage site.
- B The proteins from DRG and olfactory bulbs were extracted in 1% CHAPS lysis buffer. After single-step and tandem affinity purification, TAP-tagged Nav1.7 were detected using Western blotting with anti-HAT antibody.
- C The proteins from different tissues including hypothalamus, sciatic nerve, spinal cord, olfactory bulbs and DRG from KI mice, and pooled tissues from WT mice were extracted in 1% CHAPS lysis buffer. After single-step affinity purification, TAP-tagged Nav1.7 was detected using Western blotting with anti-HAT antibody.
- D The interaction between TAP-tagged Nav1.7 and identified Nav1.7 protein-protein interactors including Scn3b, Syt2, Crmp2, Gprn1, Lat1 and Tmed10 were validated using a co-immunoprecipitation *in vitro* system. The expression vectors containing cDNA of validated genes were cloned and transfected into a HEK293 cell line stably expressing TAP-tagged Nav1.7. After transfection, TAP-tagged Nav1.7 complexes were immunoprecipitated with anti-FLAG antibody and the selected candidates were detected with their specific antibody using Western blotting. The results showed the expected sizes of Scn3b (32 kDa), Syt2 (44 kDa), Crmp2 (70 kDa), Gprn1 (two isoforms: 80 kDa and 110kDa), Lat1 (57 kDa) and Tmed10 (21 kDa).

E Tissue expression pattern of TAP-tagged Nav1.7. The proteins were extracted from different tissues in both KI and WT littermate control mice and anti-FLAG used to detect TAP-tagged Nav1.7 using western blotting.

**Figure 6. Analysis of Nav1.7 complex proteins.**

A Cellular localization of identified Nav1.7 interacting proteins.

B Protein class of identified Nav1.7 interacting proteins categorized using PANTHER Classification System.

**Figure 7. Electrophysiological characterisation of Nav1.7 in HEK293 cells following transfection with Crmp2 and incubation with Lacosamide (LCM).**

A Representative raw current traces of Nav1.7 stably expressed in HEK293 cells in response to the activation pulse protocol shown. Each trace shows a different condition: + Crmp2 transfection and + incubation with 100  $\mu$ M LCM.

B IV plot of Nav1.7 current density in the absence and presence of 100  $\mu$ M LCM. Compared with Nav1.7 basal currents ( $n = 10$ ), LCM incubation had no significant effect on sodium channel density ( $n = 12$ ,  $p = 0.402$ ).

C IV plot of Nav1.7 in HEK293 cells in the presence and absence of Crmp2 transfection. Compared to Nav1.7 basal currents, Crmp2 transfection caused a significant increase in Nav1.7 current density ( $n = 16$ ,  $p = 0.0041$ ).

D IV plot showing current density of Nav1.7 following transfection of Crmp2 and incubation with 100  $\mu$ M LCM. Incubation with LCM reversed the Crmp2-mediated current increase ( $n = 10$ ,  $p = 0.0442$ ). Data were analysed using one-way ANOVA with Tukey's *post hoc* test.

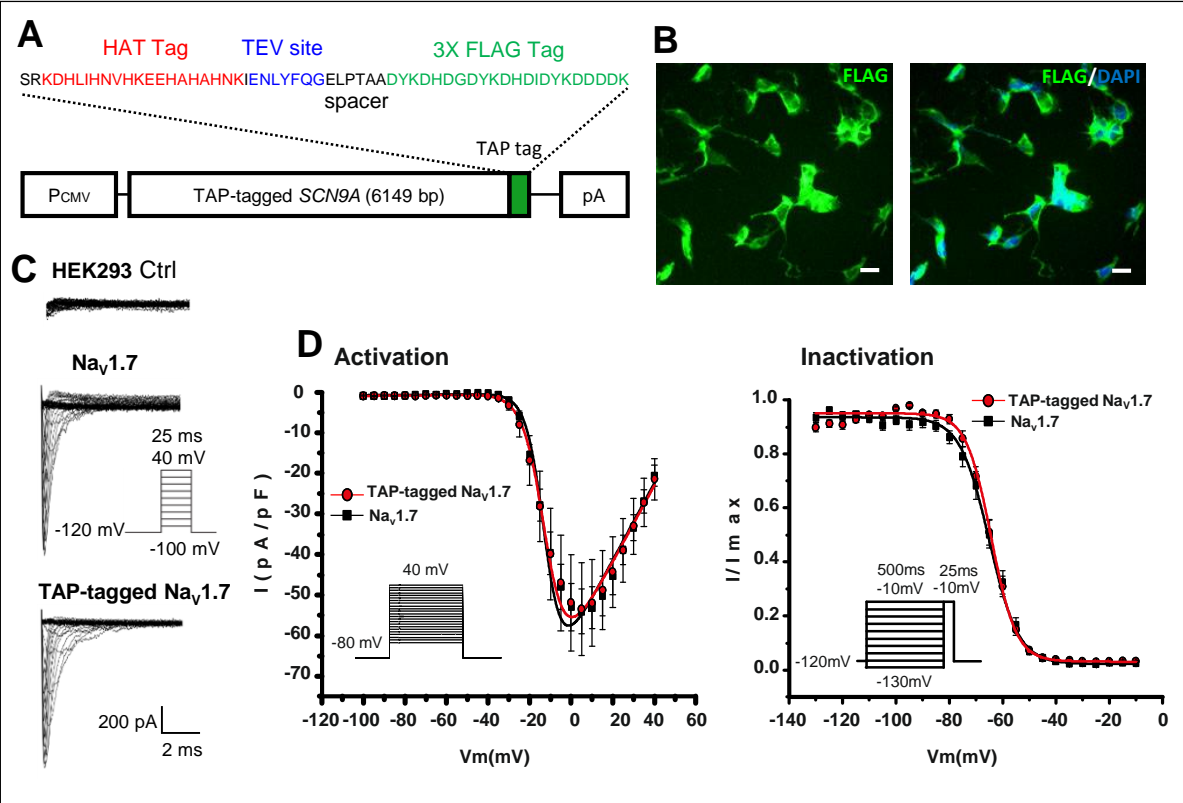

Figure 1



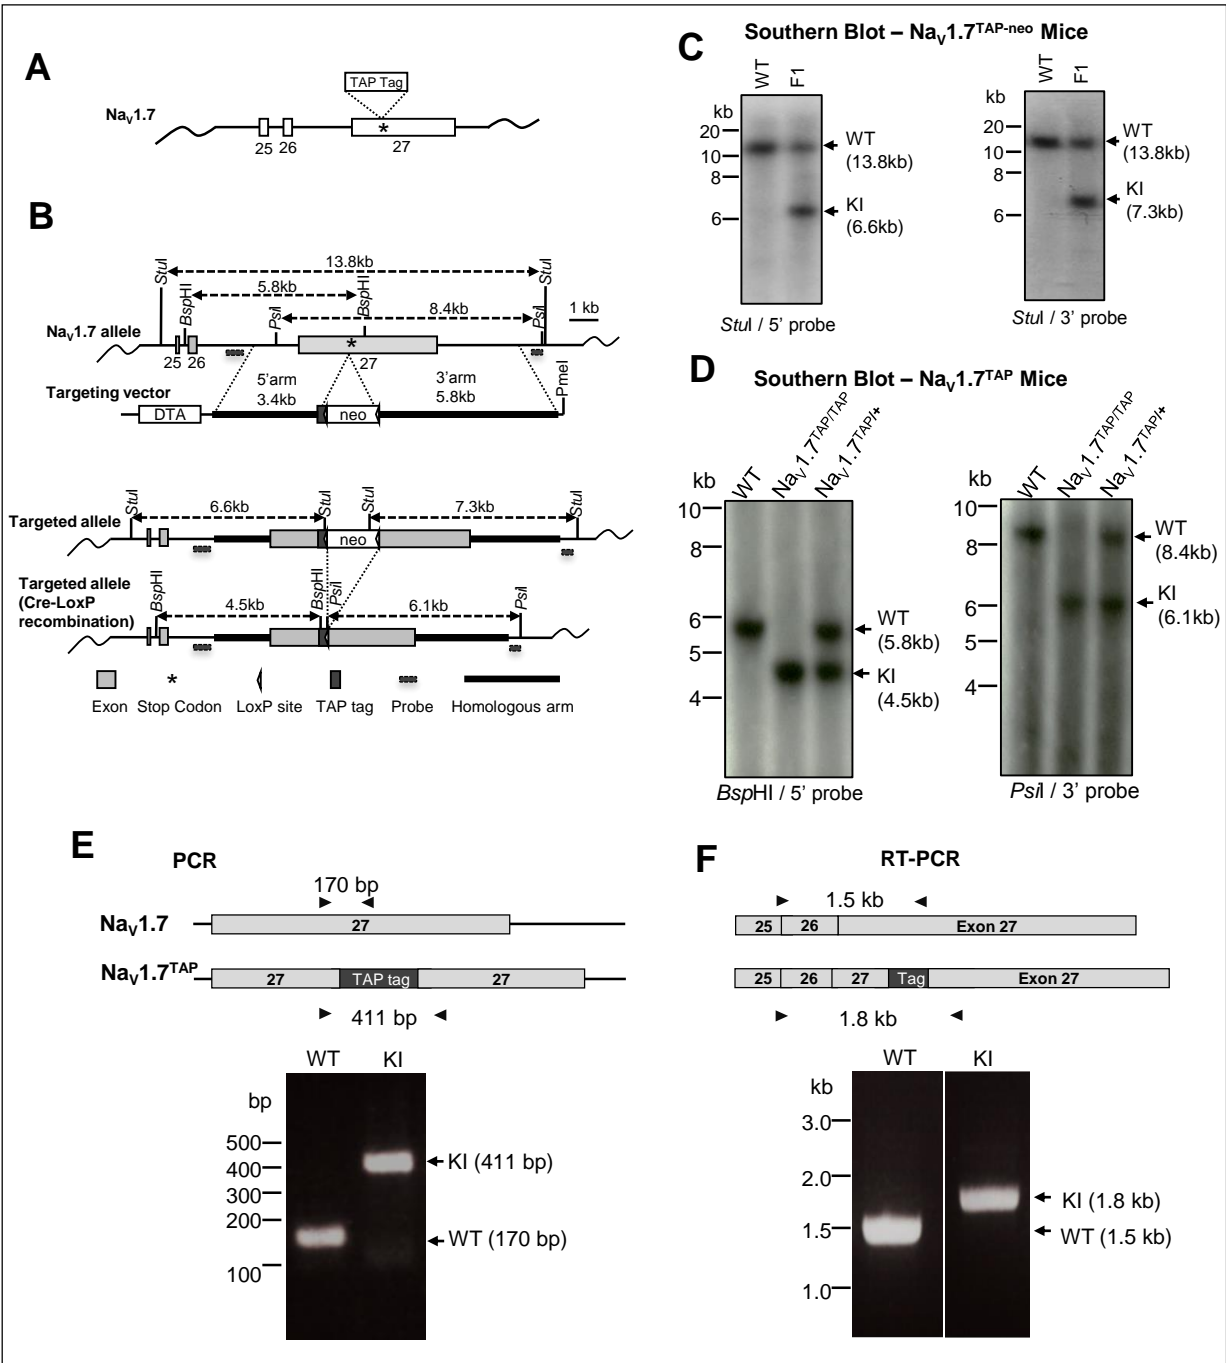

Figure 2

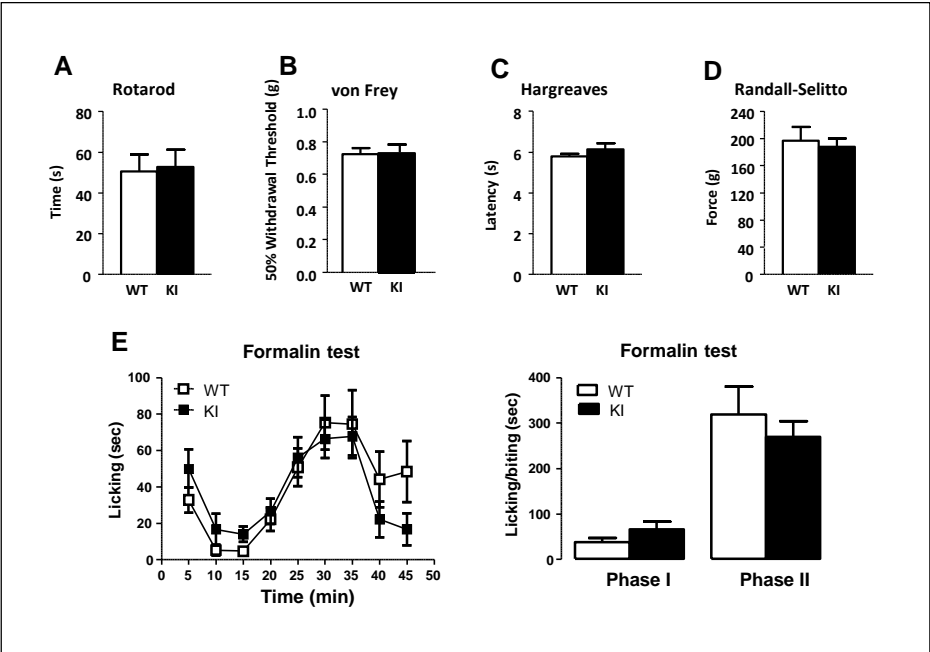

Figure 3

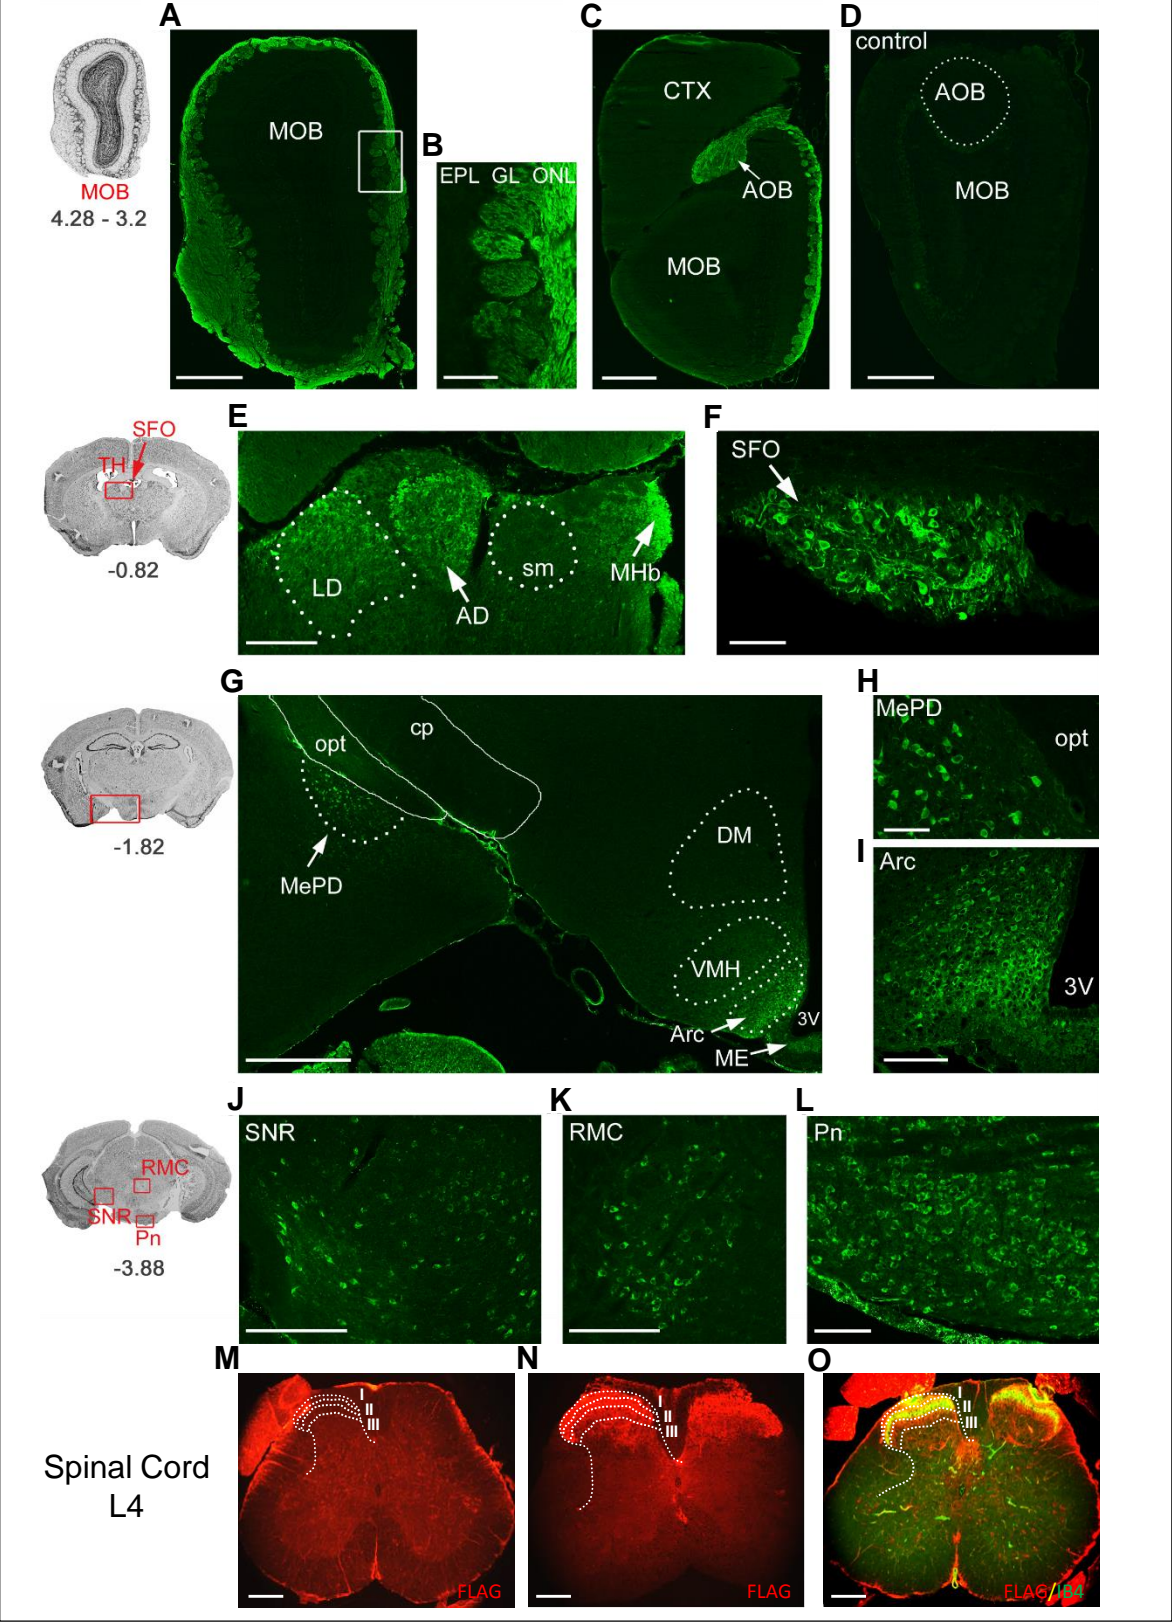

Figure 4

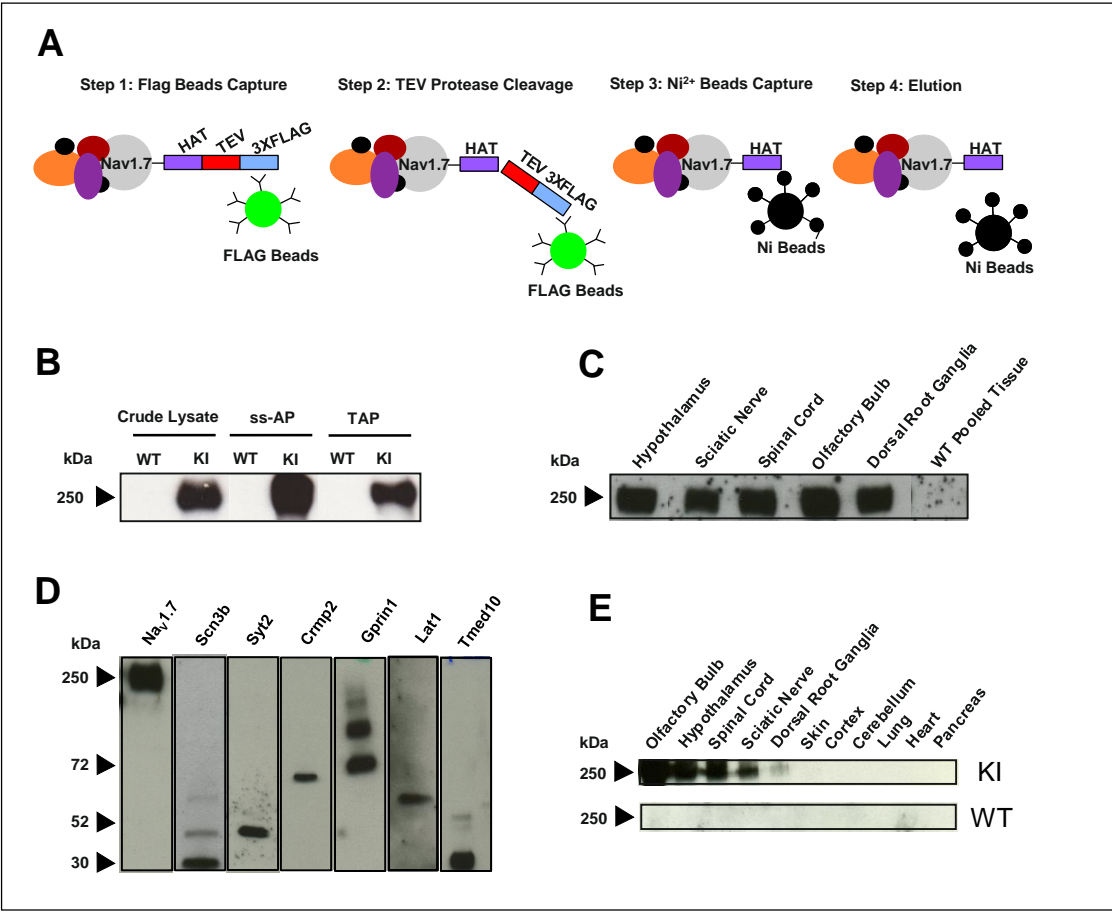

Figure 5

**A Cellular Component**

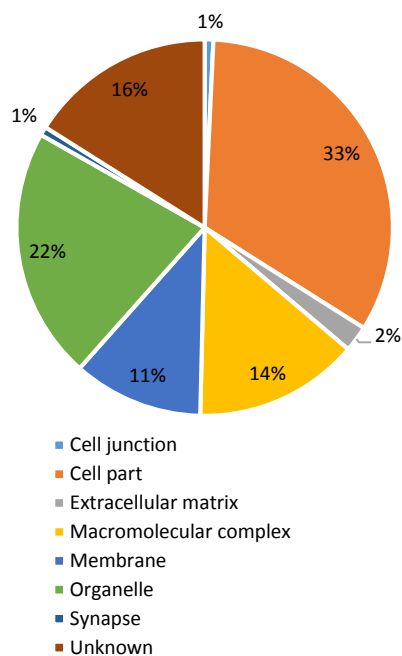

**B Protein class**

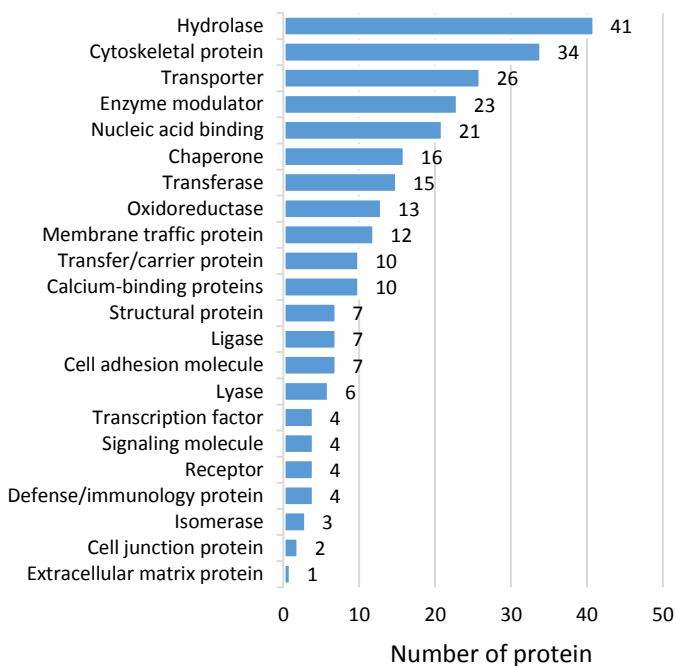

**Figure 6**

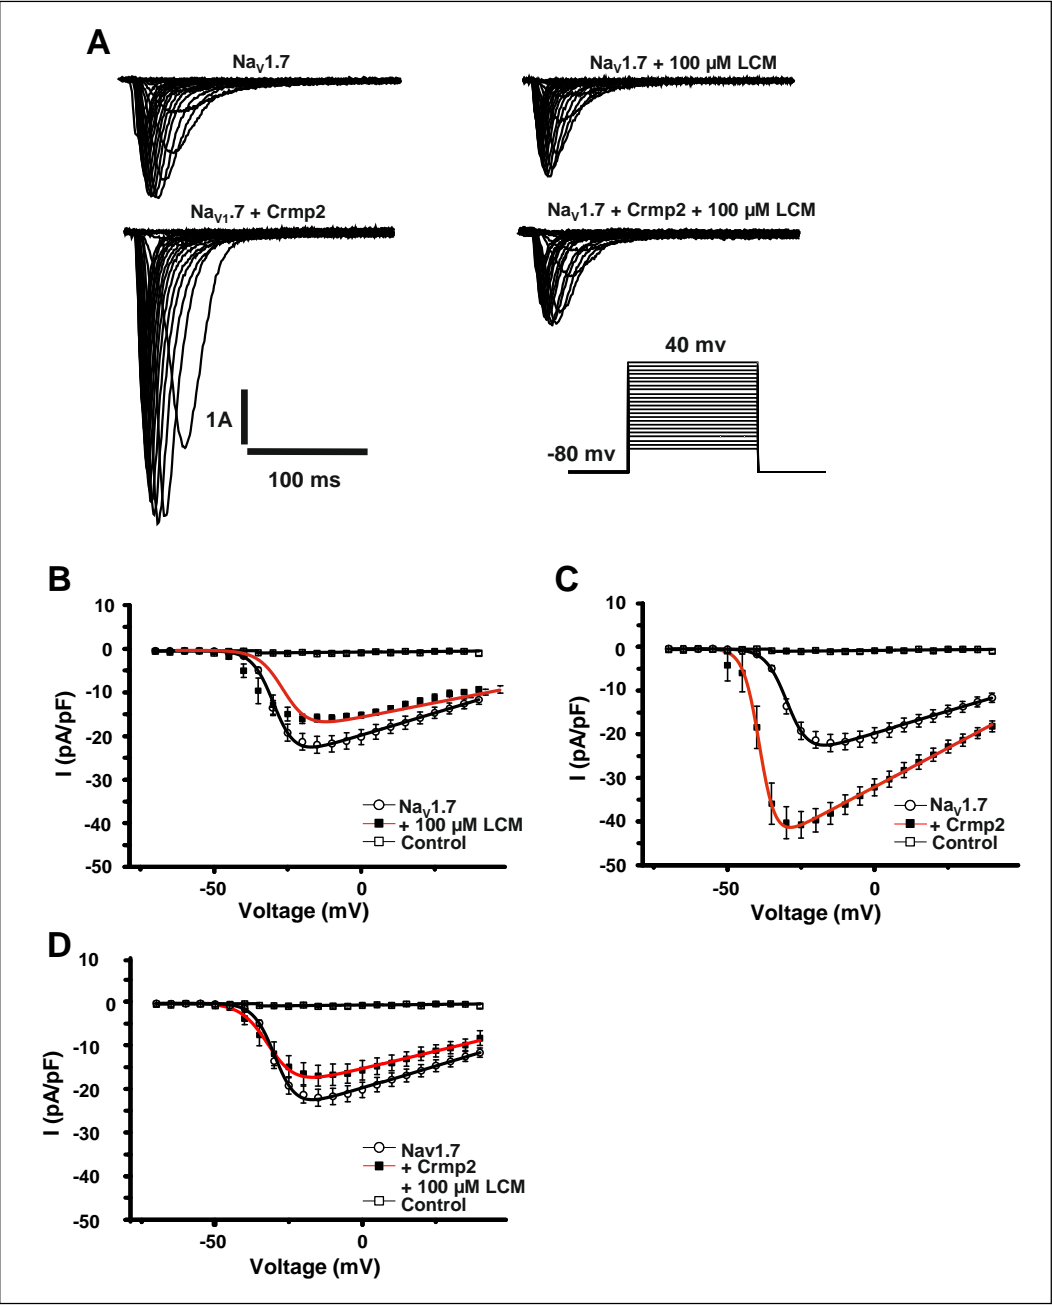

Figure 7

**Table 1. Identified Na<sub>v</sub>1.7 associated proteins (only appeared in KI group + selected candidates)**

| Gene<br>Symbol                     | Protein name                                                          | UniProt<br>Acc | Normalized Spectral Index Quantity |           |               |
|------------------------------------|-----------------------------------------------------------------------|----------------|------------------------------------|-----------|---------------|
|                                    |                                                                       |                | KI (Mean)                          | WT (Mean) | Ratio (KI/WT) |
| Proteins appeared in KI group only |                                                                       |                |                                    |           |               |
| Actr2                              | Actin-related protein 2                                               | P61161         | 1.34E-07                           | 0.00E+00  | KI only       |
| Agpat3                             | 1-acyl-sn-glycerol-3-phosphate acyltransferase gamma                  | Q9D517         | 5.50E-08                           | 0.00E+00  | KI only       |
| Ahnak                              | Protein Ahnak                                                         | E9Q616         | 5.34E-08                           | 0.00E+00  | KI only       |
| Ahsa1                              | Activator of 90 kDa heat shock protein ATPase homolog 1               | Q8BK64         | 1.12E-07                           | 0.00E+00  | KI only       |
| Akap12                             | Isoform 2 of A-kinase anchor protein 12                               | Q9WVTQ5-2      | 1.23E-07                           | 0.00E+00  | KI only       |
| Apoo                               | Apolipoprotein O                                                      | Q9DCZ4         | 5.53E-07                           | 0.00E+00  | KI only       |
| Bola2                              | BolA-like protein 2                                                   | Q8BGS2         | 2.28E-06                           | 0.00E+00  | KI only       |
| Calb2                              | Calretinin                                                            | Q08331         | 1.83E-07                           | 0.00E+00  | KI only       |
| Camsap3                            | Isoform 2 of Calmodulin-regulated spectrin-associated protein 3       | Q80VC9-2       | 6.56E-08                           | 0.00E+00  | KI only       |
| Cdh2                               | Cadherin-2                                                            | P15116         | 5.88E-08                           | 0.00E+00  | KI only       |
| Ddb1                               | DNA damage-binding protein 1                                          | Q3U1J4         | 7.32E-08                           | 0.00E+00  | KI only       |
| Des                                | Desmin                                                                | P31001         | 5.91E-08                           | 0.00E+00  | KI only       |
| Dsp                                | Desmoplakin                                                           | E9Q557         | 2.17E-08                           | 0.00E+00  | KI only       |
| Erh                                | Enhancer of rudimentary homolog                                       | P84089         | 9.12E-07                           | 0.00E+00  | KI only       |
| Fabp7                              | Fatty acid-binding protein, brain                                     | P51880         | 5.87E-07                           | 0.00E+00  | KI only       |
| Fga                                | Isoform 2 of Fibrinogen alpha chain                                   | E9PV24-2       | 1.06E-06                           | 0.00E+00  | KI only       |
| Flna                               | Filamin-A                                                             | Q8BTM8         | 4.00E-07                           | 0.00E+00  | KI only       |
| Gpx4                               | Isoform Cytoplasmic of Phospholipid hydroperoxide glutathioneroxidase | O70325-2       | 1.15E-07                           | 0.00E+00  | KI only       |
| Homer2                             | Isoform 2 of Homer protein homolog 2                                  | Q9QWW1-2       | 1.22E-06                           | 0.00E+00  | KI only       |
| Htatsf1                            | HIV Tat-specific factor 1 homolog                                     | Q8BGC0         | 9.15E-08                           | 0.00E+00  | KI only       |
| Lnp                                | Protein lunapark                                                      | Q7TQ95         | 7.52E-08                           | 0.00E+00  | KI only       |
| Map2                               | Microtubule-associated protein (Fragment)                             | G3UZJ2         | 2.41E-07                           | 0.00E+00  | KI only       |
| Mccc2                              | Methylcrotonoyl-CoA carboxylase beta chain, mitochondrial             | Q3ULD5         | 4.63E-08                           | 0.00E+00  | KI only       |
| Mlst8                              | Target of rapamycin complex subunit LST8                              | Q9DCJ1         | 4.22E-07                           | 0.00E+00  | KI only       |
| Mpdz                               | Isoform 2 of Multiple PDZ domain protein                              | Q8VBX6-2       | 3.66E-08                           | 0.00E+00  | KI only       |
| Mpp2                               | Isoform 2 of MAGUK p55 subfamily member 2                             | Q9WV34-2       | 6.92E-08                           | 0.00E+00  | KI only       |
| Ndufb10                            | NADH dehydrogenase [ubiquinone] 1 beta subcomplex subunit 10          | Q9DCS9         | 6.24E-07                           | 0.00E+00  | KI only       |
| Ndufv3                             | NADH dehydrogenase [ubiquinone] flavoprotein 3, mitochondrial         | Q8BK30         | 9.48E-07                           | 0.00E+00  | KI only       |
| Nfasc                              | Neurofascin                                                           | Q810U3         | 4.96E-08                           | 0.00E+00  | KI only       |
| Ntm                                | Neurotrimin                                                           | Q99PJ0         | 7.69E-08                           | 0.00E+00  | KI only       |
| Ogt                                | Isoform 2 of UDP-N-acetylglucosamine                                  | Q8CGY8-2       | 5.42E-08                           | 0.00E+00  | KI only       |
| Omp                                | Olfactory marker protein                                              | Q64288         | 6.62E-07                           | 0.00E+00  | KI only       |
| Oxct1                              | Succinyl-CoA:3-ketoacid coenzyme A transferase 1, mitochondrial       | Q9D0K2         | 3.72E-07                           | 0.00E+00  | KI only       |
| Pccb                               | Propionyl-CoA carboxylase beta chain, mitochondrial                   | Q99MN9         | 6.16E-08                           | 0.00E+00  | KI only       |
| Pebp1                              | Phosphatidylethanolamine-binding protein 1                            | P70296         | 8.32E-07                           | 0.00E+00  | KI only       |
| Plekha1                            | Isoform 2 of Pleckstrin homology domain-containing family B member 1  | Q9QYE9-2       | 8.18E-07                           | 0.00E+00  | KI only       |
| Ppp1r9a                            | Protein Ppp1r9a                                                       | H3BJD0         | 6.25E-08                           | 0.00E+00  | KI only       |
| Psma1                              | Proteasome subunit alpha type-1                                       | Q9R1P4         | 1.70E-06                           | 0.00E+00  | KI only       |
| Psma4                              | Proteasome subunit alpha type-4                                       | Q9R1P0         | 3.79E-07                           | 0.00E+00  | KI only       |
| Psma5                              | Proteasome subunit alpha type-5                                       | Q9Z2U1         | 9.22E-07                           | 0.00E+00  | KI only       |
| Psma7                              | Proteasome subunit alpha type-7                                       | Q9Z2U0         | 1.77E-06                           | 0.00E+00  | KI only       |
| Psmb2                              | Proteasome subunit beta type-2                                        | Q9R1P3         | 8.92E-07                           | 0.00E+00  | KI only       |
| Psmb4                              | Proteasome subunit beta type-4                                        | P99026         | 3.54E-07                           | 0.00E+00  | KI only       |
| Psmb5                              | Proteasome subunit beta type-5                                        | O55234         | 4.79E-07                           | 0.00E+00  | KI only       |
| Psmd12                             | 26S proteasome non-ATPase regulatory subunit 12                       | Q9D8W5         | 4.47E-07                           | 0.00E+00  | KI only       |
| Psmd4                              | Isoform Rpn10B of 26S proteasome non-ATPase regulatory subunit 4      | O35226-2       | 2.13E-07                           | 0.00E+00  | KI only       |
| Rab1A                              | Ras-related protein Rab-1A                                            | P62821         | 1.90E-07                           | 0.00E+00  | KI only       |
| Rbm10                              | Isoform 3 of RNA-binding protein 10                                   | Q99KG3-3       | 7.90E-08                           | 0.00E+00  | KI only       |
| Rp2                                | Isoform 2 of Protein RXP2                                             | Q9EPK2-2       | 8.67E-07                           | 0.00E+00  | KI only       |
| Sart3                              | Squamous cell carcinoma antigen recognized by T-cells 3               | Q9JL18         | 8.80E-08                           | 0.00E+00  | KI only       |
| Scn3b                              | Sodium channel subunit beta-3                                         | Q8BHK2         | 2.64E-06                           | 0.00E+00  | KI only       |
| Sgk223                             | Tyrosine-protein kinase Sgk223                                        | Q57114         | 7.46E-09                           | 0.00E+00  | KI only       |
| Slc4a8                             | Isoform 2 of Electroneutral sodium bicarbonate exchanger 1            | Q8JZR6-2       | 1.82E-08                           | 0.00E+00  | KI only       |
| Slc7a14                            | Probable cationic amino acid transporter                              | Q8BXR1         | 1.07E-08                           | 0.00E+00  | KI only       |
| Tkt                                | Transketolase                                                         | P40142         | 7.83E-08                           | 0.00E+00  | KI only       |
| Tln1                               | Talin-1                                                               | P26039         | 3.32E-08                           | 0.00E+00  | KI only       |
| Tmed10                             | Transmembrane emp24 domain-containing protein 10                      | Q9D1D4         | 7.75E-08                           | 0.00E+00  | KI only       |
| Tusc5                              | Tumor suppressor candidate 5 homolog                                  | Q8C838         | 3.22E-07                           | 0.00E+00  | KI only       |
| Wdr7                               | WD repeat-containing protein 7                                        | Q92019         | 8.24E-08                           | 0.00E+00  | KI only       |
| Selected candidates for validation |                                                                       |                |                                    |           |               |
| Slc7a5/Lat1                        | Large neutral amino acids transporter small subunit 1                 | Q9Z127         | 1.66E-07                           | 3.11E-08  | 5.34          |
| Dpysl2/Crmp2                       | Dihydropyrimidinase-related protein 2                                 | O08553         | 7.58E-06                           | 2.26E-06  | 3.35          |
| Gprn1                              | G protein-regulated inducer of neurite outgrowth 1                    | Q3UNH4         | 3.94E-07                           | 2.05E-07  | 1.92          |
| Svt2                               | Synaptotagmin-2                                                       | P46097         | 3.81E-06                           | 2.46E-06  | 1.55          |

MGI approved gene symbols and protein names, and UniProt accession numbers are shown. Average of spectral counts from TAP-tagged Nav1.7 knock-in mice (KI) and littermate wild-type control mice (WT) and the ratios from KI group and WT group are displayed.
